# Supplementary material
Source: publisher figshare collection journal article supplement (https://acs.figshare.com/ndownloader/files/5785446)

## Supporting Information

### Palladium-Catalyzed Sequential Alkylation-Alkenylation Reactions. Application to the Synthesis of 2-Substituted-4-Benzoxepines and 2,5-Disubstituted-4-Benzoxepines

Mark Lautens,\* Jean-François Paquin and Sandrine Piguel

*Department of Chemistry, University of Toronto  
Toronto, Ontario Canada M5S 3H6*

The following includes general experimental procedures, specific details for representative reactions, and isolation and spectroscopic information for the new compounds prepared. All  $^1\text{H}$  and  $^{13}\text{C}$  NMR spectra were recorded in deuterated chloroform using tetramethylsilane or residual chloroform as internal standard at ambient temperature unless noted. High resolution mass spectra were obtained at 70 eV. Aryl iodides were purchased from commercial sources (**4**, **7**, **10**, **17**, **19**, **25**), synthesized using literature procedures (**8**<sup>1</sup>, **9**<sup>2</sup>, **11**<sup>1</sup>, **18**<sup>2</sup>), or prepared as described in this section (**20**, **28**). Bromoenates (**5**, **26**) were prepared as described in this section.

#### Aryl iodides.

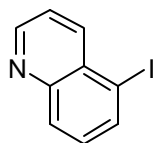

**20**

**5-iodoquinoline (20).** To a slurry of 5-aminoquinoline (348 mg, 2.4 mmol) in HCl (4 ml) at  $-10^\circ\text{C}$  was added dropwise a solution of  $\text{NaNO}_2$  (200 mg, 2.9 mmol) in  $\text{H}_2\text{O}$  (4 mL). The resulting yellow mixture was stirred 30 min at  $-10^\circ\text{C}$ . A solution of KI (797 mg, 4.8 mmol) in

<sup>1</sup> Larock, R. C.; Harrison, W. L. *J. Am. Chem. Soc.* **1984**, *106*, 4218-4227.

<sup>2</sup> Lautens, M.; Paquin, J.-F.; Piguel, S.; Dahlmann, M. *J. Org. Chem.* **2001**, *66*, 8127-8134.

H<sub>2</sub>O (4 mL) was then added slowly. The resulting brown mixture was stirred 30 min at –10°C and warmed to rt and stirred for 2 hrs. The aqueous mixture was washed with Et<sub>2</sub>O (2×) and then basified (pH ~ 10) using Na<sub>2</sub>CO<sub>3</sub> and extracted with Et<sub>2</sub>O (3×). The organic layers were combined, washed with 5% NaHSO<sub>3</sub> (3×), H<sub>2</sub>O (2×), brine, and dried over MgSO<sub>4</sub>. Activated charcoal was added and the resulting suspension was stirred 15 min, filtrated over Celite, and the solvent was evaporated to yield the desired product (114 mg, 19%) as a beige solid. IR (film)  $\nu$  = 3068, 3027, 1555, 1488, 946 cm<sup>-1</sup>; <sup>1</sup>H NMR  $\delta$  8.90 (dd, 1H, *J* = 4.2, 1.5 Hz), 8.40 (m, 1H), 8.12 (m, 2H), 7.47 (m, 2H); <sup>13</sup>C NMR  $\delta$  151.2, 148.7, 140.4, 137.7, 130.5, 130.4, 130.2, 122.7, 98.5; HRMS calcd for C<sub>9</sub>H<sub>6</sub>NI 254.9545, found 254.9552.

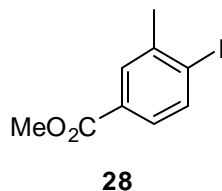

**Methyl 4-iodo-3-methylbenzoate (28).** A mixture of 4-iodo-3-methylbenzoic acid (1.0 g, 3.82 mmol) and H<sub>2</sub>SO<sub>4</sub> (few drops) in MeOH (20 mL) was refluxed for 19 hrs. The mixture was cooled to rt and the solvent was evaporated. The residue was dissolved in Et<sub>2</sub>O and washed with satd NaHCO<sub>3</sub> (3×), H<sub>2</sub>O, brine, dried over MgSO<sub>4</sub>, and the solvent was evaporated to yield **28** (704 mg, 70%) as a white solid. IR (film)  $\nu$  = 3020, 2953, 1717, 1431, 1303, 1256, 1108, 757 cm<sup>-1</sup>; <sup>1</sup>H NMR  $\delta$  7.89 (m, 2H), 7.50 (dd, 1H, *J* = 8.1, 2.1 Hz), 3.90 (s, 3H), 2.47 (s, 3H); <sup>13</sup>C NMR  $\delta$  166.7, 141.8, 139.1, 130.3, 128.0, 107.4, 52.2, 28.0; HRMS calcd for C<sub>9</sub>H<sub>9</sub>O<sub>2</sub>I 275.9647, found 275.9647.

**Bromoenoates.**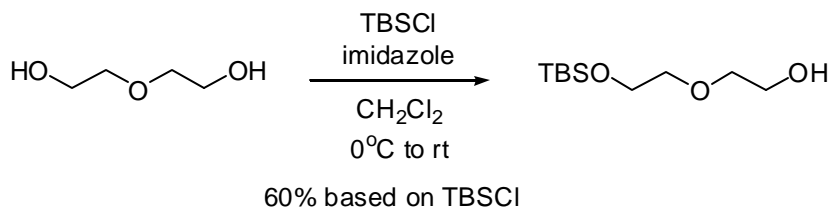

**2-(2-*tert*-butyldimethylsiloxyethoxy)ethanol.** To a 0°C solution of di(ethyleneglycol) (3.5 mL, 36.9 mmol) in CH<sub>2</sub>Cl<sub>2</sub> (40 mL) was added imidazole (1.26 g, 18.5 mmol) and the resulting mixture was stirred 5 min and TBSCl (2.79g, 18.5 mmol) was added in one portion. The reaction mixture was stirred 1hr at 0°C and warmed to rt and stirred overnight. Water was added, the organic layer was washed with 10% HCl, satd NaHCO<sub>3</sub>, brine, dried over MgSO<sub>4</sub>, and the solvent was evaporated to give the crude product that was purified by flash chromatography using 30% EtOAc/hexane as eluant to give the desired product (2.40 g, 60% based on TBSCl) as a colourless liquid. IR (neat)  $\nu$  = 3415, 2948, 2854, 1254, 1145 cm<sup>-1</sup>; <sup>1</sup>H NMR  $\delta$  3.81-3.68 (m, 4H), 3.61 (m, 4H), 2.40 (t, 1H, *J* = 6.0 Hz), 0.91 (s, 9H), 0.08 (s, 6H); <sup>13</sup>C NMR  $\delta$  72.4, 72.3, 62.7, 61.7, 25.8, 18.3, -5.4; HRMS calcd for C<sub>6</sub>H<sub>15</sub>O<sub>3</sub>Si [M - *t*-Bu]<sup>+</sup> 163.0790, found 163.0786.

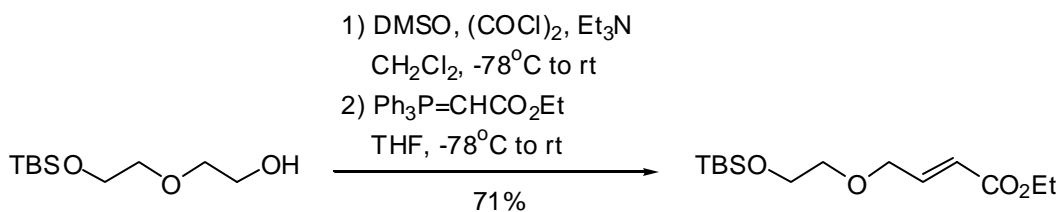

**Ethyl (2*E*)-4-(2-*tert*-butyldimethylsiloxyethoxy)but-2-enoate.** To a -78°C solution of DMSO (993  $\mu$ L, 14.0 mmol) in CH<sub>2</sub>Cl<sub>2</sub> (20 mL) was added dropwise (COCl)<sub>2</sub> (916  $\mu$ L, 10.5 mmol). The mixture was stirred at -78°C for 30 min. A solution of 2-(2-*tert*-butyldimethylsiloxy-

ethoxy)ethanol (1.54 g, 6.99 mmol) in  $\text{CH}_2\text{Cl}_2$  (5 mL) was added dropwise and the reaction mixture was stirred 45 min at  $-78^\circ\text{C}$ .  $\text{Et}_3\text{N}$  (4.81 mL, 34.5 mmol) was added dropwise and the reaction mixture was stirred 15 min at  $-78^\circ\text{C}$  and warmed to rt and stirred for 1 hr. The reaction mixture was cooled to  $-78^\circ\text{C}$  and a solution of (carbethoxymethylene)triphenylphosphorane (2.92 g, 8.39 mmol) in THF (20 mL) was added dropwise. The mixture was stirred 15 min at  $-78^\circ\text{C}$  and warmed to rt and stirred for 2 hrs. Satd  $\text{NH}_4\text{Cl}$  was added; the aqueous layer was extracted with  $\text{CH}_2\text{Cl}_2$  (3 $\times$ ). The combined organic layers were washed with  $\text{H}_2\text{O}$ , brine, dried over  $\text{MgSO}_4$ , and the solvent was evaporated to yield the crude product that was purified by flash chromatography using  $\text{Et}_2\text{O}$ /hexane (10  $\rightarrow$  15%) as eluant to yield the desired product (1.44 g, 71%) as a colourless liquid along with the cis isomer (179 mg, 9%). Trans isomer: IR (neat)  $\nu = 2940, 2856, 1725, 1466, 1304\text{ cm}^{-1}$ ;  $^1\text{H}$  NMR  $\delta$  6.95 (dt, 1H,  $J = 15.9, 4.2\text{ Hz}$ ), 6.10 (dt, 1H,  $J = 15.9, 2.1\text{ Hz}$ ), 4.20 (m, 4H), 3.79 (t, 2H,  $J = 5.1\text{ Hz}$ ), 3.56 (t, 2H,  $J = 5.1\text{ Hz}$ ), 1.29 (t, 3H,  $J = 7.2\text{ Hz}$ ), 0.91 (s, 9H), 0.08 (s, 6H);  $^{13}\text{C}$  NMR  $\delta$  166.3, 144.4, 121.1, 72.3, 69.8, 62.7, 60.2, 25.8, 18.3, 14.2, -5.4; HRMS calcd for  $\text{C}_{10}\text{H}_{19}\text{O}_4\text{Si} [\text{M} - t\text{-Bu}]^+$  231.1053, found 231.1055. Cis isomer: IR (neat)  $\nu = 2939, 2857, 1724, 1465, 1412\text{ cm}^{-1}$ ;  $^1\text{H}$  NMR  $\delta$  6.39 (dt, 1H,  $J = 12.0, 4.8\text{ Hz}$ ), 5.80 (dt, 1H,  $J = 12.0, 2.4\text{ Hz}$ ), 4.62 (dd, 2H,  $J = 4.8, 2.4\text{ Hz}$ ), 4.17 (q, 2H,  $J = 7.2\text{ Hz}$ ), 3.78 (t, 2H,  $J = 5.1\text{ Hz}$ ), 3.56 (t, 2H,  $J = 5.1\text{ Hz}$ ), 1.29 (t, 3H,  $J = 7.2\text{ Hz}$ ), 0.90 (s, 9H), 0.08 (s, 6H);  $^{13}\text{C}$  NMR  $\delta$  166.0, 148.7, 119.3, 72.2, 69.3, 62.6, 60.1, 25.9, 18.3, 14.2, -5.3; HRMS calcd for  $\text{C}_{14}\text{H}_{28}\text{O}_4\text{Si}$  288.1757, found 288.1754.

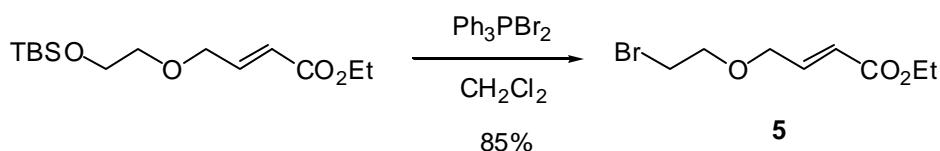

**Ethyl (2E)-4-(2-bromoethyl)but-2-enoate (5).** To a suspension of  $\text{Ph}_3\text{PBr}_2$  in  $\text{CH}_2\text{Cl}_2$  (8 mL) was added a solution of ethyl (2E)-4-(2-*tert*-butyldimethylsiloxyethoxy)but-2-enoate in  $\text{CH}_2\text{Cl}_2$  (4 mL), the resulting suspension turned into a solution after 5 min and was stirred 2 hrs at rt.  $\text{CH}_2\text{Cl}_2$  was added and the solution was washed with  $\text{H}_2\text{O}$  (2 $\times$ ), brine, dried over  $\text{MgSO}_4$ , and the solvent was evaporated to give the crude product that was purified by flash chromatography using  $\text{CH}_2\text{Cl}_2$ /toluene (10  $\rightarrow$  15%) as eluant to yield the desired product (512 mg, 85%) as a slightly yellow liquid. IR (neat)  $\nu = 2981, 2907, 2846, 1724, 1662, 1303, 1178 \text{ cm}^{-1}$ ;  $^1\text{H}$  NMR  $\delta$  6.94 (dt, 1H,  $J = 15.6, 4.5 \text{ Hz}$ ), 6.11 (dt, 1H,  $J = 15.6, 2.1 \text{ Hz}$ ), 4.22 (m, 4H), 3.81 (t, 2H,  $J = 6.0 \text{ Hz}$ ), 3.49 (t, 2H,  $J = 6.0 \text{ Hz}$ ), 1.30 (t, 3H,  $J = 7.2 \text{ Hz}$ );  $^{13}\text{C}$  NMR  $\delta$  166.1, 143.5, 121.7, 70.6, 69.5, 60.4, 30.1, 14.2; HRMS calcd for  $\text{C}_8\text{H}_{13}\text{O}_3\text{Br}$  236.0048, found 236.0040.

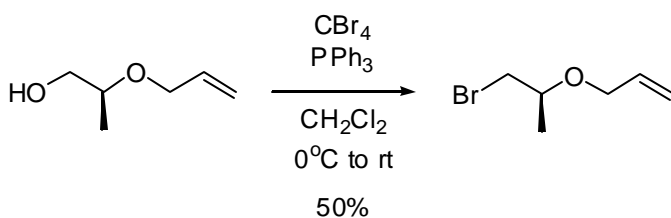

**3-[(1S)-2-bromo-1-methylethyl]oxyprop-1-ene.** To a  $0^\circ\text{C}$  solution of (2S)-2-(allyloxy)propan-1-ol<sup>3</sup> (718 mg, 6.18 mmol) in  $\text{CH}_2\text{Cl}_2$  (20 mL) was added  $\text{CBr}_4$  (3.07 g, 9.27 mmol) and  $\text{PPh}_3$  (2.43 g, 9.27 mmol). The mixture was stirred 10 min at  $0^\circ\text{C}$  and then warmed to rt and

stirred overnight. The solvent was evaporated and the crude product was purified by flash chromatography using Et<sub>2</sub>O/hexane (2 → 5%) as eluant gave the desired product (550 mg, 50%) as a volatile colourless liquid.  $[\alpha]_D^{25} = +3.2$  (c 1.25, CHCl<sub>3</sub>); IR (neat)  $\nu = 3081, 2978, 2865, 1138, 1084, 926 \text{ cm}^{-1}$ ; <sup>1</sup>H NMR  $\delta$  5.92 (ddt, 1H,  $J = 17.4, 10.2, 5.7 \text{ Hz}$ ), 5.30 (dq, 1H,  $J = 17.4, 1.5 \text{ Hz}$ ), 5.19 (dq, 1H,  $J = 10.2, 1.5 \text{ Hz}$ ), 4.05 (dt, 2H,  $J = 5.7, 1.5 \text{ Hz}$ ), 3.69 (m, 1H), 3.39 (m, 2H), 1.29 (d, 3H,  $J = 6.6 \text{ Hz}$ ); <sup>13</sup>C NMR  $\delta$  134.6, 117.1, 74.0, 70.0, 36.3, 18.8; MS (EI) : 85(100), 64(64), 121(22), 123(20).

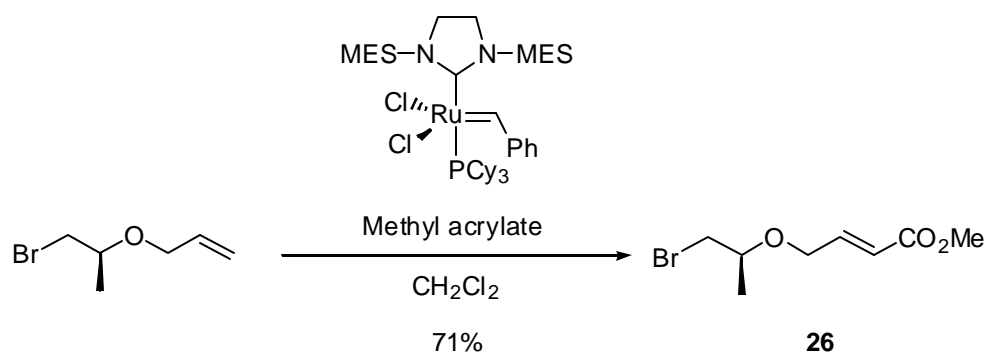

**Methyl (2E)-4-[(1S)-2-bromo-1-methylethyl]oxybut-2-enoate (26).** To a solution of 3-[(1S)-2-bromo-1-methylethyl]oxyprop-1-ene (200 mg, 1.12 mmol) and methyl acrylate (2.5 mL, 28.0 mmol) in CH<sub>2</sub>Cl<sub>2</sub> (2.5 mL) was added Grubb's 2<sup>nd</sup> generation catalyst (48 mg, 5 mol%). The resulting mixture was stirred at rt for 4 hrs and DMSO<sup>4</sup> (200  $\mu$ L, 50 equiv. relative to the catalyst) was added and the mixture stirred for 20 hrs. Evaporation of the volatiles gave a crude product that was purified by flash chromatography using Et<sub>2</sub>O/hexane (1:9) as eluant to yield **26** (189 mg, 71%) as a colorless liquid.  $[\alpha]_D^{25} = +16.8$  (c 1.15, CHCl<sub>3</sub>); IR (neat)  $\nu = 2986, 2959, 2845, 1723, 1303 \text{ cm}^{-1}$ ; <sup>1</sup>H NMR  $\delta$  6.97 (dt, 1H,  $J = 15.6, 4.2 \text{ Hz}$ ), 6.13 (dt, 1H,  $J = 15.6, 2.1$

<sup>3</sup> Obtained in 66% yield over 2 steps from ethyl (S)-(-)-lactate, for experimental details, see Broggini, G.; Molteni, G.; Pilati, T. *Tetrahedron: Asymmetry* **2000**, 11, 1975-1984.

<sup>4</sup> Ahn, Y. M.; Yang, K. L.; Georg, G. I. *Org. Lett.* **2001**, 3, 1411-1413.

Hz), 4.22 (dd, 2H,  $J = 4.2, 2.1$  Hz), 3.71 (m, 4H), 3.40 (m, 2H), 1.30 (d, 3H,  $J = 6.0$  Hz);  $^{13}\text{C}$  NMR  $\delta$  166.5, 144.3, 120.8, 75.0, 67.5, 51.5, 36.0, 18.7; HRMS calcd for  $\text{C}_8\text{H}_{13}\text{O}_3\text{Br}$  237.0126, found 237.0130.

## 2-Substituted-4-benzoxepines and 2,5-disubstituted-4-benzoxepines.

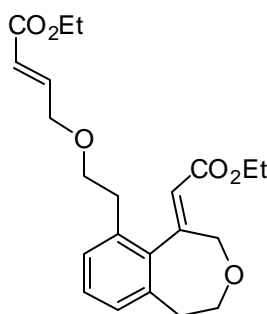

6

**Cyclization using iodobenzene. General procedure. Ethyl (2E)-4-{2-[(5Z)-5-(2-ethoxy-2-oxoethylidene)-1,2,4,5-tetrahydro-3-benzoxepin-6-yl]ethoxy}but-2-enoate (6).** Under argon, a flame-dried round-bottom flask equipped with a condenser was charged with iodobenzene (20  $\mu\text{L}$ , 0.18 mmol), **5** (182 mg, 0.77 mmol),  $\text{Cs}_2\text{CO}_3$  (118 mg, 0.36 mmol), norbornene (40.9 mg, 0.43 mmol), tri-2-furylphosphine (8.5 mg, 0.037 mmol),  $\text{Pd}(\text{OAc})_2$  (4.0 mg, 0.018 mg) and  $\text{CH}_3\text{CN}$  (5 mL). The reaction mixture was heated at  $85^\circ\text{C}$  for 15 hrs. The reaction was quenched by the addition of satd  $\text{NH}_4\text{Cl}$  and the mixture was extracted with  $\text{Et}_2\text{O}$  (3 $\times$ ). The combined organic layers were washed with brine and dried over  $\text{MgSO}_4$ . Removal of the solvent gave the crude product that was purified by flash chromatography using  $\text{Et}_2\text{O}$ /hexane (10 $\rightarrow$ 20%) as eluant to give the desired product (36.7 mg, 53%) as a colourless oil. IR (neat)  $\nu = 2978, 2929, 2859, 1718, 1704, 1658, 1623, 1177$   $\text{cm}^{-1}$ ;  $^1\text{H}$  NMR  $\delta$  7.25 (m, 2H), 7.03 (dd, 1H,  $J = 6.0, 2.4$  Hz), 6.91 (dt, 1H,  $J = 15.6, 4.4$  Hz), 6.02 (d, 1H,  $J = 15.6$  Hz), 5.81 (t, 1H,  $J = 2.0$  Hz), 4.86 (br m, 2H),

4.20 (m, 6H), 3.85-3.58 (m, 4H), 3.12 (br m, 2H), 2.94 (br m, 1H), 2.56 (br m, 1H), 1.22 (m, 6H);  $^{13}\text{C}$  NMR  $\delta$  166.2, 165.8, 162.3, 144.1, 138.9, 136.7, 135.1, 128.8, 128.4, 125.7, 121.2, 118.2, 71.9, 69.5, 68.8, 67.7, 60.2, 53.3, 34.0, 33.1, 14.2, 14.1; HRMS calcd for  $\text{C}_{22}\text{H}_{28}\text{O}_6$  388.1886, found 388.1875.

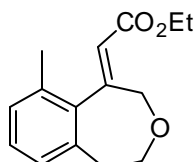**12**

**Cyclization using *ortho*-substituted aryl iodides. General procedure. Ethyl (2Z)-(9-methyl-4,5-dihydro-3-benzoxepin-1(2H)-ylidene)acetate (**12**).** A round-bottom flask equipped with a condenser was charged with 2-iodotoluene (32  $\mu\text{L}$ , 0.25 mmol), **5** (241 mg, 1.0 mmol),  $\text{Cs}_2\text{CO}_3$ , (164 mg, 0.50 mmol), norbornene (54 mg, 0.57 mmol),  $\text{Pd}(\text{OAc})_2$  (5.9 mg, 0.026 mmol), tri-2-furylphosphine (11.8 mg, 0.051 mmol) and  $\text{CH}_3\text{CN}$  (2.5 mL). The resulting solution was heated at  $85^\circ\text{C}$  for 23 hrs. The reaction was quenched by the addition of satd  $\text{NH}_4\text{Cl}$  and the mixture was extracted with  $\text{Et}_2\text{O}$  (3 $\times$ ). The combined organic layers were washed with brine and dried over  $\text{MgSO}_4$ . Removal of the solvent gave the crude product that was purified by preparative TLC with  $\text{CH}_2\text{Cl}_2$  as the eluant to afford **12** (53.2 mg, 85%) as a colourless oil. IR (neat)  $\nu$  = 3063, 2978, 2950, 2850, 1708, 1623, 1169  $\text{cm}^{-1}$ ;  $^1\text{H}$  NMR  $\delta$  7.19 (m, 2H), 6.99 (t, 1H,  $J$  = 4.0 Hz), 5.73 (t, 1H,  $J$  = 2.4 Hz), 4.88 (m, 2H), 4.21 (q, 2H,  $J$  = 7.2 Hz), 3.79 (m, 2H), 2.90 (br s, 2H), 2.37 (s, 3H), 1.31 (t, 3H,  $J$  = 7.2 Hz);  $^{13}\text{C}$  NMR  $\delta$  165.9, 162.5, 138.3, 136.6, 134.4, 129.7, 128.3, 125.1, 118.2, 68.6, 67.8, 60.1, 33.8, 20.5, 14.2; HRMS calcd for  $\text{C}_{15}\text{H}_{18}\text{O}_3$  246.1255, found 246.1263.



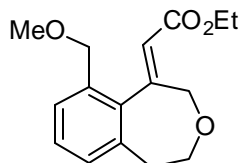**13**

**Ethyl (2Z)-[9-(methoxymethyl)-4,5-dihydro-3-benzoxepin-1(2H)-ylidene]acetate (13).**

Following the general procedure for *ortho*-substituted aryl iodides on a 0.27 mmol scale using **8** and **5**, **13** was isolated as a colourless oil (17.4 mg, 23%) by preparative TLC using 30% Et<sub>2</sub>O/hexane. IR (neat)  $\nu$  = 3064, 2978, 2928, 2863, 2822, 1708, 1622, 1448, 1177 cm<sup>-1</sup>; <sup>1</sup>H NMR  $\delta$  7.41 (dd, 1H,  $J$  = 7.8, 0.9 Hz), 7.30 (t, 1H,  $J$  = 7.8 Hz), 7.11 (dd, 1H,  $J$  = 7.8, 0.9 Hz), 5.88 (t, 1H,  $J$  = 2.4 Hz), 4.88 (br s, 2H), 4.41 (s, 2H), 4.21 (q, 2H,  $J$  = 7.2 Hz), 3.80 (br s, 2H), 3.36 (s, 3H), 2.62 (br s, 2H), 1.31 (t, 3H,  $J$  = 7.2 Hz); <sup>13</sup>C NMR  $\delta$  165.9, 161.4, 138.9, 136.8, 134.9, 128.7, 128.5, 127.2, 118.1, 72.6, 68.7, 67.7, 60.1, 57.9, 33.8, 14.2; HRMS calcd for C<sub>16</sub>H<sub>20</sub>O<sub>4</sub> 276.1362, found 276.1372.

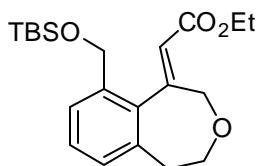**14**

**Ethyl (2Z)-[9-(*tert*-butyldimethylsilyloxymethyl)-4,5-dihydro-3-benzoxepin-1(2H)-**

**ylidene]acetate (14).** Following the general procedure for *ortho*-substituted aryl iodides on a 0.17 mmol scale using **9** and **5**, **14** was isolated as a colourless oil (34.1 mg, 23%) by preparative TLC using 40% Et<sub>2</sub>O/hexane. IR (neat)  $\nu$  = 2950, 2929, 2852, 1708, 1662, 1620, 1461 cm<sup>-1</sup>; <sup>1</sup>H NMR  $\delta$  7.33 (d, 1H,  $J$  = 8.0 Hz), 7.20 (t, 1H,  $J$  = 8.0 Hz), 7.00 (d, 1H,  $J$  = 8.0 Hz), 5.85 (t, 1H,  $J$  = 2.4 Hz), 4.79 (br s, 2H), 4.56 (s, 2H), 4.20 (m, 2H), 3.70 (br s, 2H), 2.60 (br s, 2H), 1.21 (t, 3H,

$J = 7.2$  Hz), 0.82 (s, 9H), 0.0 (s, 6H);  $^{13}\text{C}$  NMR  $\delta$  165.9, 161.5, 138.1, 137.7, 136.5, 128.5, 128.2, 126.7, 118.2, 68.6, 67.8, 63.3, 60.0, 33.8, 25.8, 18.2, 14.2, -5.3; HRMS calcd for  $\text{C}_{17}\text{H}_{23}\text{O}_4\text{Si} [\text{M} - t\text{-Bu}]^+$  319.1366, found 319.1371.

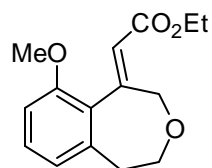**15**

**Ethyl (2Z)-(9-methoxy-4,5-dihydro-3-benzoxepin-1(2H)-ylidene)acetate (15).** Following the general procedure for *ortho*-substituted aryl iodides on a 0.15 mmol scale using **9** and **5**, **14** was isolated as a colourless oil (30 mg, 75%) by flash chromatography using 5%  $\text{Et}_2\text{O}$ /hexane. IR (neat)  $\nu = 3063, 2957, 2929, 282, 1704, 1620, 1268, 1468 \text{ cm}^{-1}$ ;  $^1\text{H}$  NMR  $\delta$  7.24 (t, 1H,  $J = 8.0$  Hz), 6.89 (d, 1H,  $J = 8.0$  Hz), 6.78 (d, 1H,  $J = 8.0$  Hz), 5.97 (t, 1H,  $J = 2.4$  Hz), 4.88 (d, 2H,  $J = 7.2$  Hz), 4.20 (q, 2H,  $J = 7.2$  Hz), 3.79 (m, 5H), 2.84 (t, 2H,  $J = 6.4$  Hz), 1.32 (t, 3H,  $J = 7.2$  Hz);  $^{13}\text{C}$  NMR  $\delta$  166.3, 157.9, 156.1, 138.3, 129.5, 127.1, 120.2, 119.1, 110.3, 68.7, 67.7, 59.9, 55.7, 33.7, 14.3; HRMS calcd for  $\text{C}_{15}\text{H}_{18}\text{O}_4$  262.1205, found 262.1201.

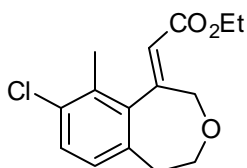**21**

**Cyclization using polysubstituted aryl iodides. General procedure. Ethyl (2Z)-(8-chloro-9-methyl-4,5-dihydro-3-benzoxepin-1(2H)-ylidene)acetate (21).** A round-bottom flask equipped with a condenser was charged with  $\text{Cs}_2\text{CO}_3$  (130 mg, 0.40 mmol), norbornene (38 mg, 0.40

mmol), Pd(OAc)<sub>2</sub> (4.5 mg, 0.020 mmol), tri-2-furylphosphine (9.2 mg, 0.040 mmol). A solution of **5** and 2-chloro-6-iodotoluene (50.6 mg, 0.20 mmol) in CH<sub>3</sub>CN (2 mL) was added. The resulting mixture was heated at 85°C for 19 hrs and then quenched by addition of H<sub>2</sub>O. The aqueous solution was extracted with Et<sub>2</sub>O (3×). The organic layers were combined, washed with brine, and dried over MgSO<sub>4</sub>. Removal of the solvent gave a crude oil that was purified by flash chromatography using 10% acetone/hexane to give **21** as a colorless solid (47.2 mg, 85%). IR (neat)  $\nu$  = 3060, 2929, 2867, 1695, 1174 cm<sup>-1</sup>; <sup>1</sup>H NMR  $\delta$  7.30 (d, 1H, *J* = 8.1 Hz), 6.95 (d, 1H, *J* = 8.1 Hz), 5.69 (t, 1H, *J* = 2.4 Hz), 4.87 (m, 2H), 4.22 (q, 2H, *J* = 7.2 Hz), 3.77 (br m, 2H), 3.07 (br m, 1H), 2.59 (br m, 1H), 2.40 (s, 3H), 1.32 (t, 3H, *J* = 7.2 Hz); <sup>13</sup>C NMR  $\delta$  165.8, 162.1, 140.3, 135.1, 134.4, 132.8, 129.1, 126.0, 119.1, 68.5, 67.6, 60.3, 33.6, 18.3, 14.2; HRMS calcd for C<sub>15</sub>H<sub>17</sub>O<sub>3</sub>Cl 280.0866, found 280.0874.

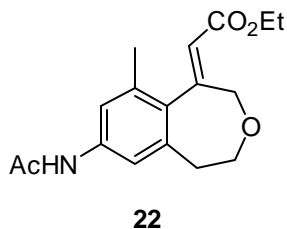

**Ethyl (2Z)-[7-(acetylamino)-9-methyl-4,5-dihydro-3-benzoxepin-1(2H)-ylidene]acetate (**22**).**

Following the general procedure for polysubstituted aryl iodides on a 0.200 mmol scale using **18** and **5**, **22** was isolated as a slightly yellow solid (48.5 mg, 80%) by flash chromatography using EtOAc/hexane (50 → 60%) as eluant. IR (neat)  $\nu$  = 3728, 2924, 2851, 1700, 1516 cm<sup>-1</sup>; <sup>1</sup>H NMR  $\delta$  7.58 (br s, 1H), 7.31 (s, 1H), 7.22 (s, 1H), 5.68 (t, 1H, *J* = 2.4 Hz), 4.86 (d, 2H, *J* = 2.4 Hz), 4.21 (q, 2H, *J* = 7.2 Hz), 3.77 (br m, 2H), 2.80 (br m, 2H), 2.32 (s, 3H), 2.15 (s, 3H), 1.31 (t, 3H,

$J = 7.2$  Hz);  $^{13}\text{C}$  NMR  $\delta$  168.5, 166.0, 162.1, 137.8, 137.7, 135.6, 134.4, 120.4, 118.2, 116.8, 68.7, 67.7, 60.2, 33.9, 24.6, 20.7, 14.2; HRMS calcd for  $\text{C}_{17}\text{H}_{21}\text{NO}_4$  303.1471, found 303.1478.

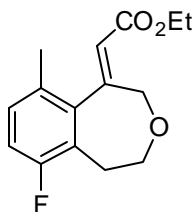**23**

**Ethyl (2Z)-(6-fluoro-9-methyl-4,5-dihydro-3-benzoxepin-1(2H)-ylidene)acetate (23).**

Following the general procedure for polysubstituted aryl iodides on a 0.200 mmol scale using **19** and **5**, **23** was isolated as a colourless oil (41.2 mg, 78%) by flash chromatography using acetone/hexane (3  $\rightarrow$  5%) as eluant. IR (neat)  $\nu = 2977, 2860, 1709, 1628, 1482, 1238, 1181$   $\text{cm}^{-1}$ ;  $^1\text{H}$  NMR  $\delta$  7.12 (m, 1H), 6.96 (t, 1H,  $J = 8.4$  Hz), 5.72 (t, 1H,  $J = 2.4$  Hz), 4.87 (d, 2H,  $J = 2.4$  Hz), 4.22 (q, 2H,  $J = 7.2$  Hz), 3.78 (br s, 2H), 2.94 (br s, 2H), 2.32 (s, 3H), 1.32 (t, 3H,  $J = 7.2$  Hz);  $^{13}\text{C}$  NMR  $\delta$  165.8, 161.6, 161.5, 159.1, 155.9, 140.4, 140.3, 130.5, 130.4, 130.0, 129.9, 122.9, 122.7, 118.7, 115.1, 114.8, 110.7, 68.5, 67.1, 64.5, 60.3, 25.0, 24.9, 20.0, 14.2; HRMS calcd for  $\text{C}_{15}\text{H}_{17}\text{O}_3\text{F}$  264.1162, found 264.1154.

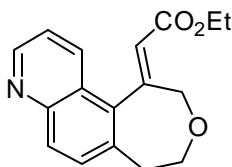**24**

**Ethyl (2Z)-4,5-dihydrooxepino[4,5-f]quinolin-1(2H)-ylideneacetate (24).** Following the general procedure for polysubstituted aryl iodides on a 0.200 mmol scale using **20** and **5**, **24** was isolated as yellow oil (40.8 mg, 72%) by flash chromatography using 70%  $\text{Et}_2\text{O}$ /hexane as

eluant. IR (neat)  $\nu$  = 3075, 2957, 2860, 1710, 1502, 1200, 1164, 1105  $\text{cm}^{-1}$ ;  $^1\text{H}$  NMR  $\delta$  8.89 (d, 1H,  $J$  = 4.2 Hz), 8.44 (d, 1H,  $J$  = 8.7 Hz), 8.10 (d, 1H,  $J$  = 8.7 Hz), 7.56 (d, 1H,  $J$  = 8.7 Hz), 7.41 (dd, 1H,  $J$  = 8.7, 4.2 Hz), 5.86 (t, 1H,  $J$  = 2.1 Hz), 5.01 (d, 2H,  $J$  = 2.1 Hz), 4.26 (q, 2H,  $J$  = 7.2 Hz), 3.95 (br m, 1H), 3.79 (br m, 1H), 3.34 (br m, 1H), 2.80 (br m, 1H), 1.34 (t, 3H,  $J$  = 7.2 Hz);  $^{13}\text{C}$  NMR  $\delta$  165.7, 160.4, 149.7, 147.9, 135.3, 134.3, 133.3, 130.3, 129.8, 125.8, 121.4, 120.3, 68.6, 66.8, 60.4, 33.9, 14.2; HRMS calcd for  $\text{C}_{17}\text{H}_{17}\text{NO}_3$  283.1208, found 283.1205.

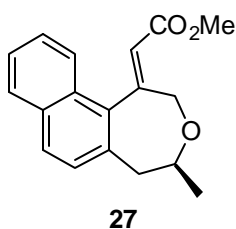

**Methyl (2Z)-[(4S)-4-methyl-4,5-dihydronaphtho[1,2-d]oxepin-1-(2H)-ylidene]acetate (27).**

Following the general procedure for polysubstituted aryl iodides on a 0.200 mmol scale using **25** and **26**, **27** was isolated as 1.2:1 mixture of **27** and unreacted **26** (82 mg, 72% yield of **27**) by flash chromatography using 15%  $\text{Et}_2\text{O}$ /hexane. Analytically pure material could be obtained by further purification by flash chromatography using 5% acetone/hexane as eluant to obtained **27** as a white solid.  $[\alpha]_{\text{D}}^{25}$ : +20.2 (c 1.0,  $\text{CHCl}_3$ ); IR (film)  $\nu$  = 2932, 2865, 1707, 1212, 1175, 1101  $\text{cm}^{-1}$ ;  $^1\text{H}$  NMR  $\delta$  8.11 (d, 1H,  $J$  = 7.5 Hz), 7.82 (m, 2H), 7.45 (m, 2H), 7.28 (d, 1H,  $J$  = 7.5 Hz), 5.96 (t, 1H,  $J$  = 2.4 Hz), 5.06 (m, 2H), 4.42 (m, 1H), 3.79 (s, 3H), 3.40 (m, 1H), 2.57 (d, 1H,  $J$  = 14.4 Hz), 1.08 (d, 3H,  $J$  = 6.3 Hz);  $^{13}\text{C}$  NMR  $\delta$  166.4, 162.5, 134.8, 133.2, 131.9, 130.7, 128.5, 128.3, 127.6, 126.5, 125.1, 125.0, 118.1, 72.0, 69.2, 51.4, 38.8, 20.4; HRMS calcd for  $\text{C}_{18}\text{H}_{18}\text{O}_3$  282.1256, found 282.1249.

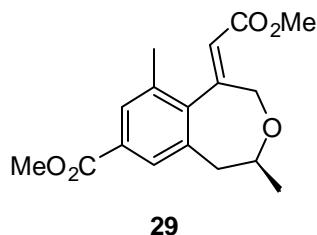

**Methyl (1Z,4R)-1-(2-methoxy-2-oxoethylidene)-4,9-dimethyl-1,2,4,5-tetrahydro-3-benzoxepine-7-carboxylate (29).** Following the general procedure for polysubstituted aryl iodides on a 0.200 mmol scale using **28** and **26**, **29** was isolated as slightly yellow oil (35.5 mg, 55%, 71% based on recovered **28**) by flash chromatography using Et<sub>2</sub>O/hexane (10→20%) as eluant.  $[\alpha]_D^{25}$ : +116.5 (c 0.97, CHCl<sub>3</sub>); IR (neat)  $\nu$  = 2952, 1725, 1710, 1630, 1434, 1218, 1102, 913 cm<sup>-1</sup>; <sup>1</sup>H NMR (-20°C)  $\delta$  7.90 (s, 1H), 7.64 (s, 1H), 5.77 (t, 1H,  $J$  = 2.5 Hz), 4.97 (s, 2H), 4.02 (m, 1H), 3.94 (s, 3H), 3.78 (s, 3H), 3.23 (dd, 1H,  $J$  = 14.0, 7.0 Hz), 2.49 (d, 1H,  $J$  = 14.0 Hz), 2.42 (s, 3H), 1.08 (d, 3H,  $J$  = 6.5 Hz); <sup>13</sup>C NMR  $\delta$  166.9, 166.1, 162.2, 142.6, 135.0, 130.9, 128.9, 127.3, 117.9, 72.3, 68.9, 52.3, 51.6, 38.2, 20.8, 20.0; HRMS calcd for C<sub>17</sub>H<sub>20</sub>O<sub>5</sub> 304.1311, found 304.1318.

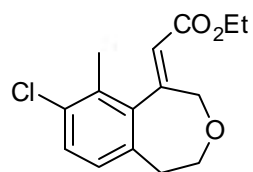

21

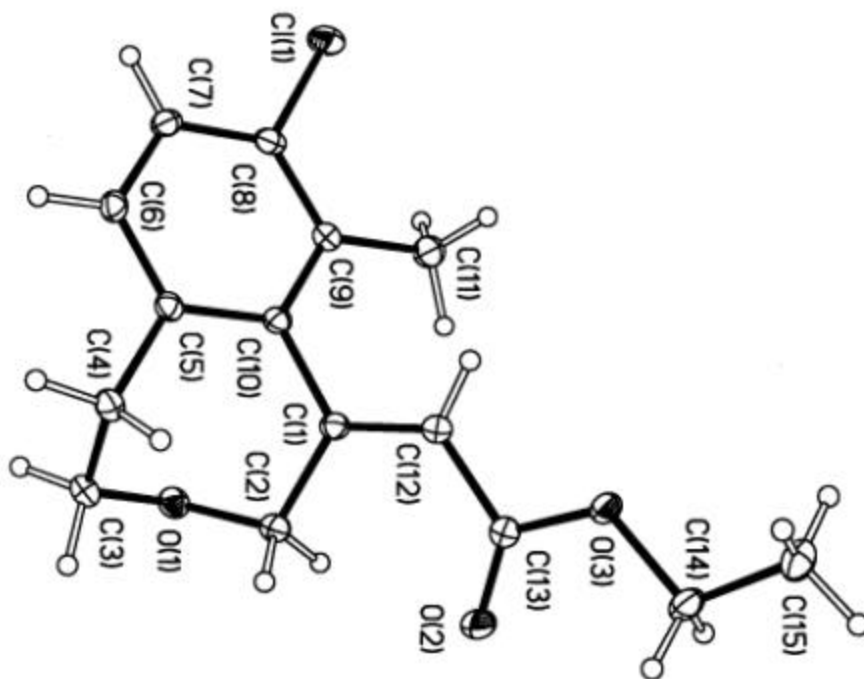

Table 1. Crystal data and structure refinement for k01311.

|                                   |                                                   |                                |
|-----------------------------------|---------------------------------------------------|--------------------------------|
| Identification code               | k01311                                            |                                |
| Empirical formula                 | C <sub>15</sub> H <sub>17</sub> Cl O <sub>3</sub> |                                |
| Formula weight                    | 280.74                                            |                                |
| Temperature                       | 150(1) K                                          |                                |
| Wavelength                        | 0.71073 Å                                         |                                |
| Crystal system                    | Monoclinic                                        |                                |
| Space group                       | P2(1)/c                                           |                                |
| Unit cell dimensions              | a = 8.8182(2) Å                                   | $\alpha = 90^\circ$ .          |
|                                   | b = 10.7490(2) Å                                  | $\beta = 103.1660(10)^\circ$ . |
|                                   | c = 15.0338(3) Å                                  | $\gamma = 90^\circ$ .          |
| Volume                            | 1387.55(5) Å <sup>3</sup>                         |                                |
| Z                                 | 4                                                 |                                |
| Density (calculated)              | 1.344 Mg/m <sup>3</sup>                           |                                |
| Absorption coefficient            | 0.276 mm <sup>-1</sup>                            |                                |
| F(000)                            | 592                                               |                                |
| Crystal size                      | 0.30 x 0.26 x 0.20 mm <sup>3</sup>                |                                |
| Theta range for data collection   | 2.78 to 27.47°.                                   |                                |
| Index ranges                      | 0 < h < 11, 0 < k < 13, -19 < l < 19              |                                |
| Reflections collected             | 14760                                             |                                |
| Independent reflections           | 3163 [R(int) = 0.032]                             |                                |
| Completeness to theta = 27.47°    | 99.7 %                                            |                                |
| Absorption correction             | Semi-empirical from equivalents                   |                                |
| Max. and min. transmission        | 0.9468 and 0.9217                                 |                                |
| Refinement method                 | Full-matrix least-squares on F <sup>2</sup>       |                                |
| Data / restraints / parameters    | 3163 / 0 / 175                                    |                                |
| Goodness-of-fit on F <sup>2</sup> | 1.045                                             |                                |
| Final R indices [I > 2sigma(I)]   | R1 = 0.0347, wR2 = 0.0843                         |                                |
| R indices (all data)              | R1 = 0.0439, wR2 = 0.0898                         |                                |
| Extinction coefficient            | 0.013(3)                                          |                                |
| Largest diff. peak and hole       | 0.292 and -0.272 e.Å <sup>-3</sup>                |                                |



Table 2. Atomic coordinates ( $\times 10^4$ ) and equivalent isotropic displacement parameters ( $\text{\AA}^2 \times 10^3$ ) for k01311.  $U(\text{eq})$  is defined as one third of the trace of the orthogonalized  $U^{\text{ij}}$  tensor.

|       | x       | y        | z       | U(eq) |
|-------|---------|----------|---------|-------|
| Cl(1) | 5276(1) | 2805(1)  | 6322(1) | 35(1) |
| O(1)  | 710(1)  | 6594(1)  | 7519(1) | 25(1) |
| O(2)  | 1850(1) | 9590(1)  | 5961(1) | 36(1) |
| O(3)  | 2823(1) | 9206(1)  | 4727(1) | 27(1) |
| C(1)  | 1893(1) | 6855(1)  | 6210(1) | 21(1) |
| C(2)  | 1138(2) | 7467(1)  | 6916(1) | 24(1) |
| C(3)  | -745(2) | 6003(1)  | 7147(1) | 27(1) |
| C(4)  | -801(1) | 5412(1)  | 6213(1) | 25(1) |
| C(5)  | 710(1)  | 4757(1)  | 6211(1) | 21(1) |
| C(6)  | 799(2)  | 3471(1)  | 6210(1) | 23(1) |
| C(7)  | 2205(2) | 2872(1)  | 6235(1) | 24(1) |
| C(8)  | 3522(2) | 3593(1)  | 6282(1) | 24(1) |
| C(9)  | 3514(1) | 4894(1)  | 6306(1) | 22(1) |
| C(10) | 2059(1) | 5472(1)  | 6247(1) | 20(1) |
| C(11) | 5023(2) | 5612(1)  | 6447(1) | 32(1) |
| C(12) | 2396(2) | 7500(1)  | 5570(1) | 24(1) |
| C(13) | 2303(2) | 8863(1)  | 5464(1) | 25(1) |
| C(14) | 2820(2) | 10530(1) | 4540(1) | 31(1) |
| C(15) | 3357(2) | 10692(1) | 3669(1) | 33(1) |

Table 3. Bond lengths [Å] and angles [°] for k01311.

|                  |            |
|------------------|------------|
| Cl(1)-C(8)       | 1.7525(13) |
| O(1)-C(2)        | 1.4145(16) |
| O(1)-C(3)        | 1.4265(16) |
| O(2)-C(13)       | 1.2104(16) |
| O(3)-C(13)       | 1.3437(15) |
| O(3)-C(14)       | 1.4509(16) |
| C(1)-C(12)       | 1.3414(18) |
| C(1)-C(10)       | 1.4927(17) |
| C(1)-C(2)        | 1.5253(17) |
| C(3)-C(4)        | 1.5313(18) |
| C(4)-C(5)        | 1.5079(17) |
| C(5)-C(6)        | 1.3845(18) |
| C(5)-C(10)       | 1.4079(17) |
| C(6)-C(7)        | 1.3898(18) |
| C(7)-C(8)        | 1.3846(19) |
| C(8)-C(9)        | 1.3992(19) |
| C(9)-C(10)       | 1.4095(17) |
| C(9)-C(11)       | 1.5107(18) |
| C(12)-C(13)      | 1.4731(18) |
| C(14)-C(15)      | 1.501(2)   |
| C(2)-O(1)-C(3)   | 113.05(10) |
| C(13)-O(3)-C(14) | 116.31(10) |
| C(12)-C(1)-C(10) | 119.71(11) |
| C(12)-C(1)-C(2)  | 122.97(12) |
| C(10)-C(1)-C(2)  | 117.32(11) |
| O(1)-C(2)-C(1)   | 112.46(11) |
| O(1)-C(3)-C(4)   | 112.53(10) |
| C(5)-C(4)-C(3)   | 110.59(10) |
| C(6)-C(5)-C(10)  | 119.86(11) |
| C(6)-C(5)-C(4)   | 121.12(11) |
| C(10)-C(5)-C(4)  | 118.96(11) |
| C(5)-C(6)-C(7)   | 120.85(12) |
| C(8)-C(7)-C(6)   | 118.36(12) |

|                  |            |
|------------------|------------|
| C(7)-C(8)-C(9)   | 123.47(12) |
| C(7)-C(8)-Cl(1)  | 117.04(10) |
| C(9)-C(8)-Cl(1)  | 119.49(10) |
| C(8)-C(9)-C(10)  | 116.69(11) |
| C(8)-C(9)-C(11)  | 120.26(11) |
| C(10)-C(9)-C(11) | 122.94(12) |
| C(5)-C(10)-C(9)  | 120.70(12) |
| C(5)-C(10)-C(1)  | 117.85(11) |
| C(9)-C(10)-C(1)  | 121.45(11) |
| C(1)-C(12)-C(13) | 124.92(12) |
| O(2)-C(13)-O(3)  | 123.62(12) |
| O(2)-C(13)-C(12) | 126.42(12) |
| O(3)-C(13)-C(12) | 109.95(11) |
| O(3)-C(14)-C(15) | 107.18(11) |

---

Symmetry transformations used to generate equivalent atoms:

---

Table 4. Anisotropic displacement parameters ( $\text{\AA}^2 \times 10^3$ ) for k01311. The anisotropic displacement factor exponent takes the form:  $-2\pi^2 [ h^2 a^{*2} U^{11} + \dots + 2 h k a^* b^* U^{12} ]$

|       | $U^{11}$ | $U^{22}$ | $U^{33}$ | $U^{23}$ | $U^{13}$ | $U^{12}$ |
|-------|----------|----------|----------|----------|----------|----------|
| Cl(1) | 30(1)    | 29(1)    | 46(1)    | -2(1)    | 12(1)    | 10(1)    |
| O(1)  | 29(1)    | 27(1)    | 21(1)    | 0(1)     | 9(1)     | 2(1)     |
| O(2)  | 55(1)    | 22(1)    | 40(1)    | -1(1)    | 26(1)    | 3(1)     |
| O(3)  | 38(1)    | 18(1)    | 26(1)    | 2(1)     | 13(1)    | 1(1)     |
| C(1)  | 19(1)    | 19(1)    | 24(1)    | -2(1)    | 5(1)     | 1(1)     |
| C(2)  | 26(1)    | 23(1)    | 25(1)    | -1(1)    | 9(1)     | 2(1)     |
| C(3)  | 25(1)    | 29(1)    | 32(1)    | 0(1)     | 15(1)    | 1(1)     |
| C(4)  | 20(1)    | 27(1)    | 28(1)    | -1(1)    | 8(1)     | -1(1)    |
| C(5)  | 22(1)    | 23(1)    | 18(1)    | 0(1)     | 7(1)     | 0(1)     |
| C(6)  | 27(1)    | 24(1)    | 21(1)    | -1(1)    | 9(1)     | -4(1)    |
| C(7)  | 34(1)    | 18(1)    | 23(1)    | 0(1)     | 10(1)    | 0(1)     |
| C(8)  | 26(1)    | 24(1)    | 23(1)    | -1(1)    | 9(1)     | 5(1)     |
| C(9)  | 22(1)    | 23(1)    | 23(1)    | -1(1)    | 8(1)     | 1(1)     |
| C(10) | 23(1)    | 20(1)    | 18(1)    | -1(1)    | 7(1)     | 1(1)     |
| C(11) | 21(1)    | 28(1)    | 48(1)    | -2(1)    | 10(1)    | -1(1)    |
| C(12) | 27(1)    | 21(1)    | 26(1)    | -2(1)    | 10(1)    | 0(1)     |
| C(13) | 27(1)    | 22(1)    | 26(1)    | 0(1)     | 9(1)     | 0(1)     |
| C(14) | 43(1)    | 19(1)    | 33(1)    | 5(1)     | 11(1)    | 3(1)     |
| C(15) | 41(1)    | 29(1)    | 29(1)    | 6(1)     | 7(1)     | -4(1)    |

Table 5. Hydrogen coordinates ( $\times 10^4$ ) and isotropic displacement parameters ( $\text{\AA}^2 \times 10^{-3}$ ) for k01311.

|        | x     | y     | z    | U(eq) |
|--------|-------|-------|------|-------|
| H(2A)  | 1875  | 8075  | 7275 | 29    |
| H(2B)  | 199   | 7928  | 6597 | 29    |
| H(3A)  | -1591 | 6624  | 7085 | 33    |
| H(3B)  | -930  | 5351  | 7575 | 33    |
| H(4A)  | -1671 | 4809  | 6069 | 30    |
| H(4B)  | -992  | 6065  | 5736 | 30    |
| H(6A)  | -113  | 2991  | 6192 | 28    |
| H(7A)  | 2261  | 1990  | 6220 | 29    |
| H(11A) | 5827  | 5186  | 6903 | 48    |
| H(11B) | 4869  | 6453  | 6660 | 48    |
| H(11C) | 5352  | 5660  | 5867 | 48    |
| H(12A) | 2847  | 7045  | 5154 | 29    |
| H(14A) | 3532  | 10970 | 5048 | 38    |
| H(14B) | 1759  | 10875 | 4474 | 38    |
| H(15A) | 3389  | 11580 | 3527 | 50    |
| H(15B) | 2632  | 10267 | 3171 | 50    |
| H(15C) | 4399  | 10333 | 3741 | 50    |

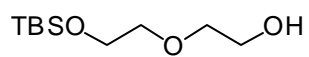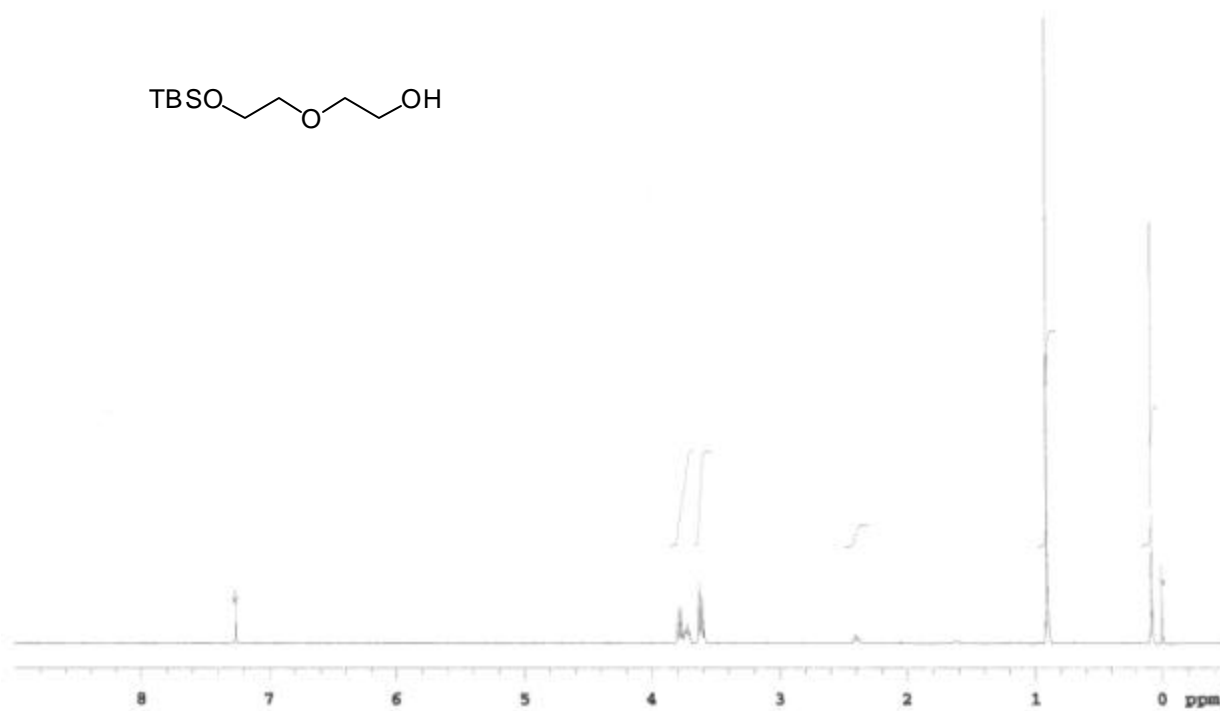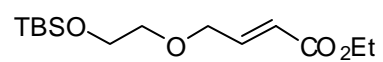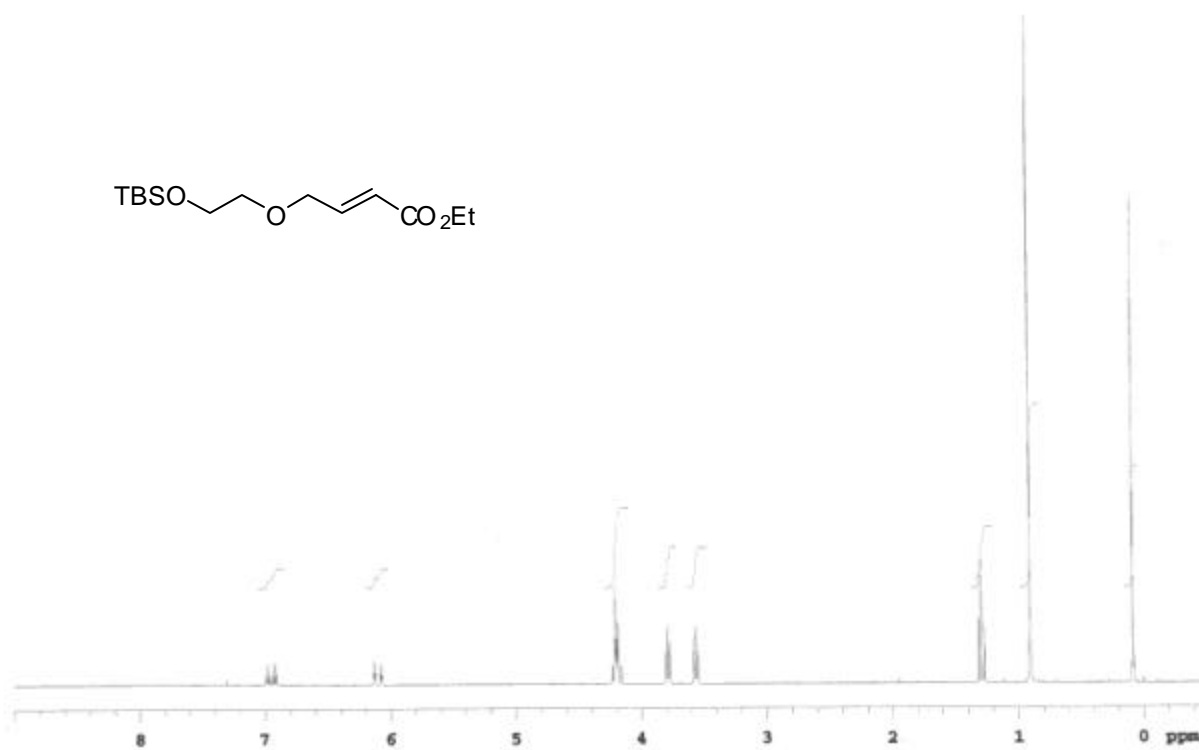

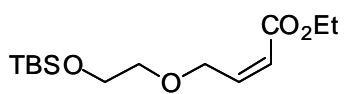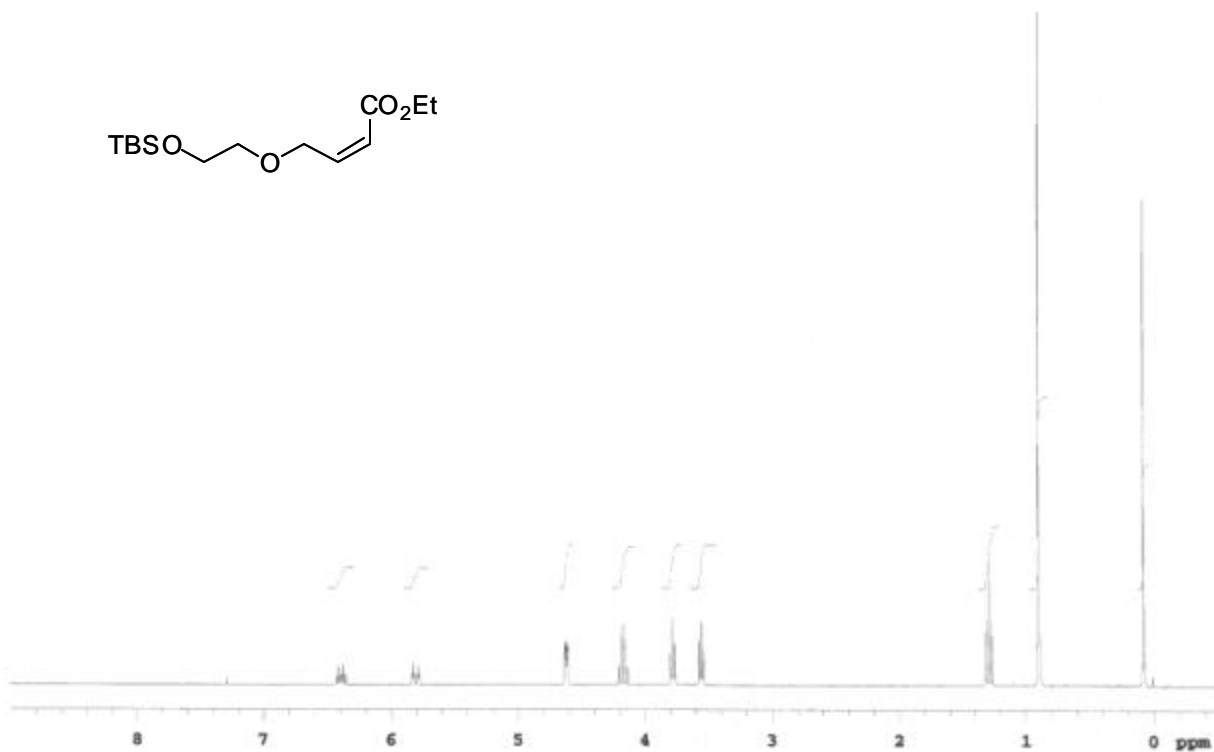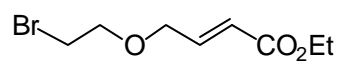**5**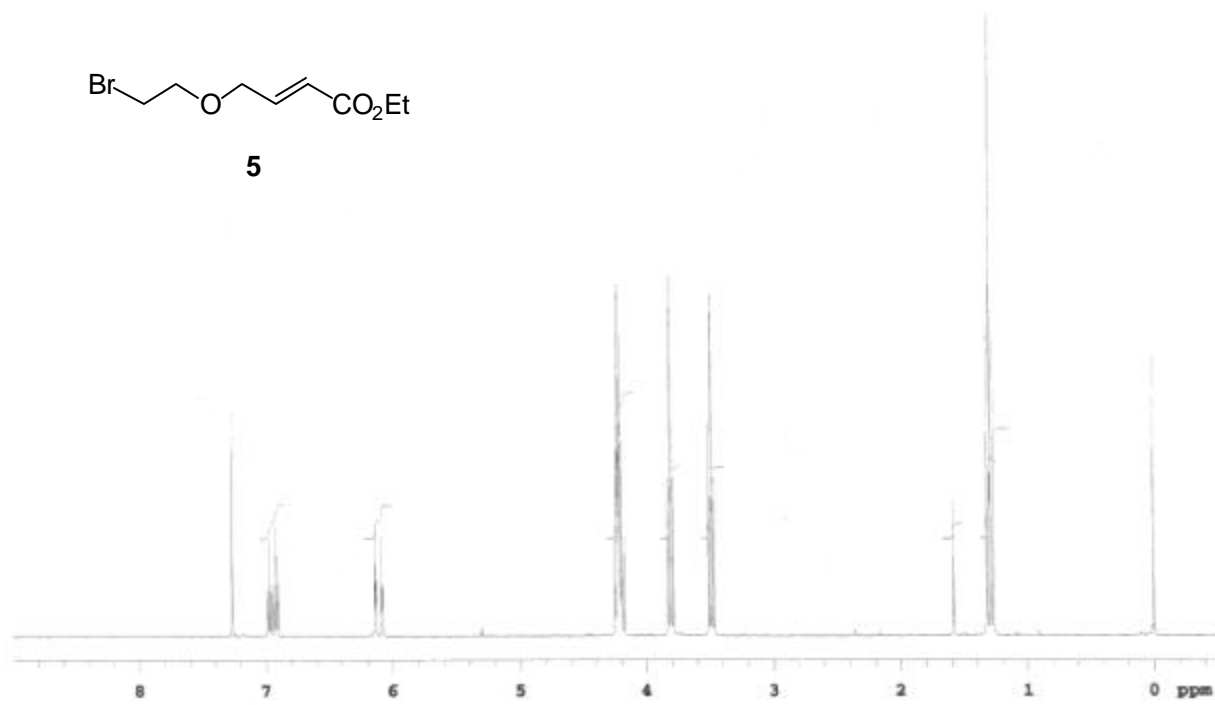

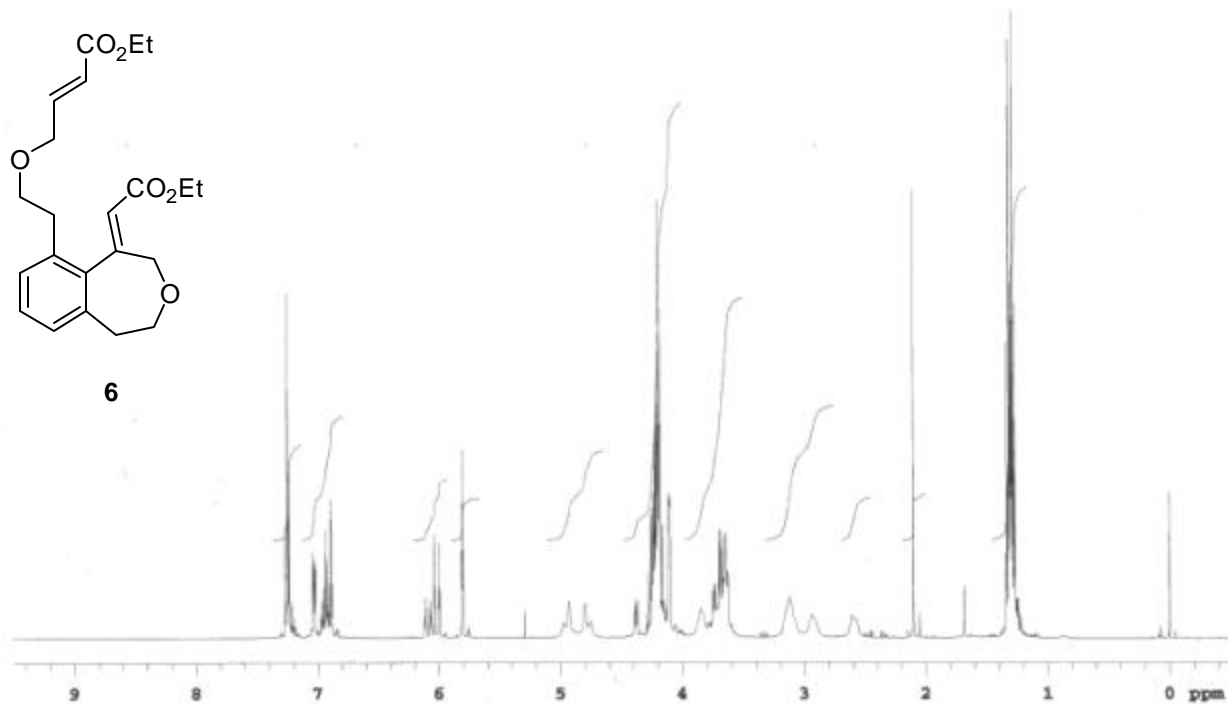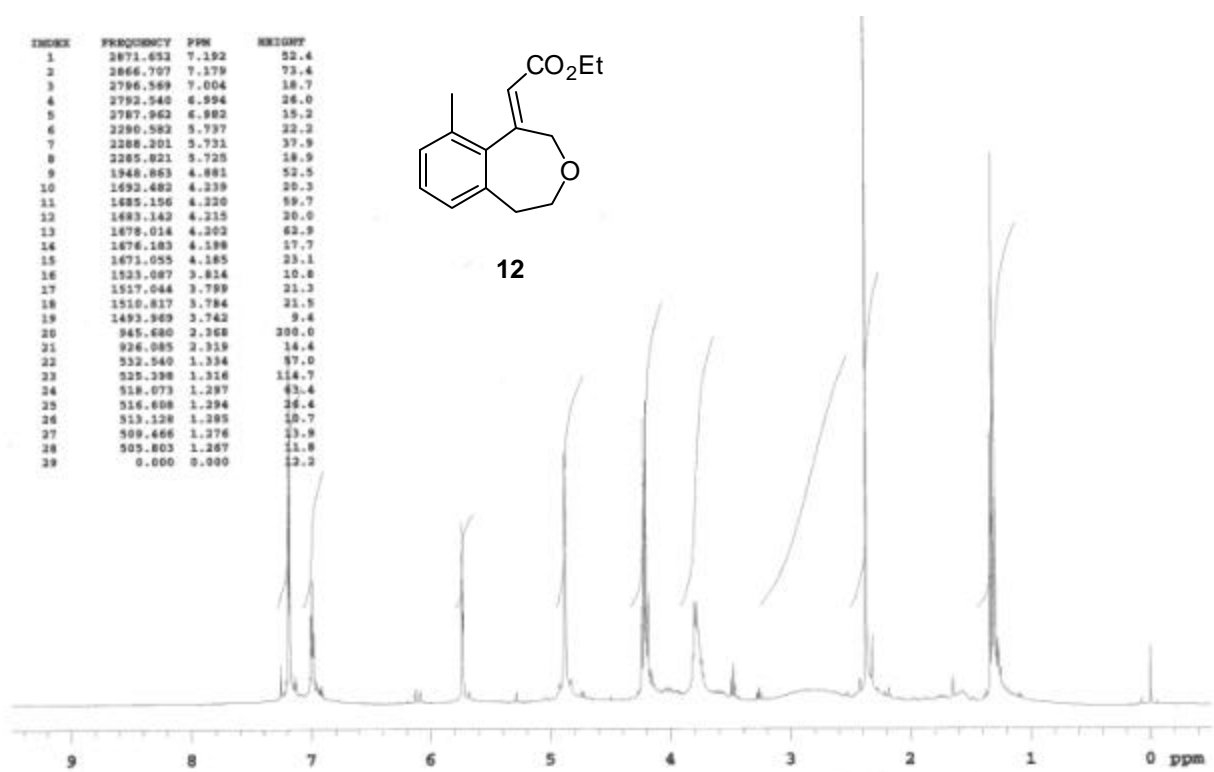



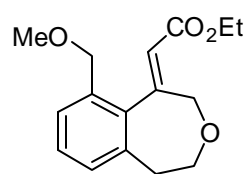**13**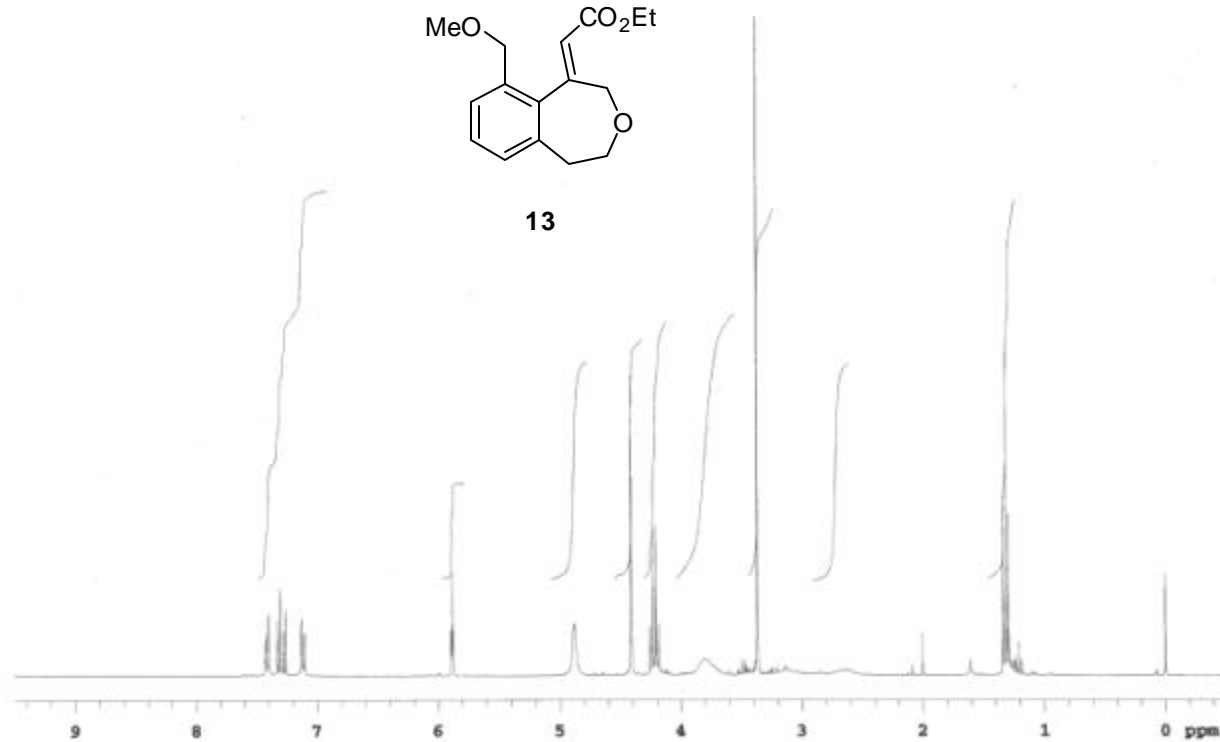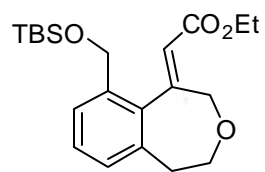**14**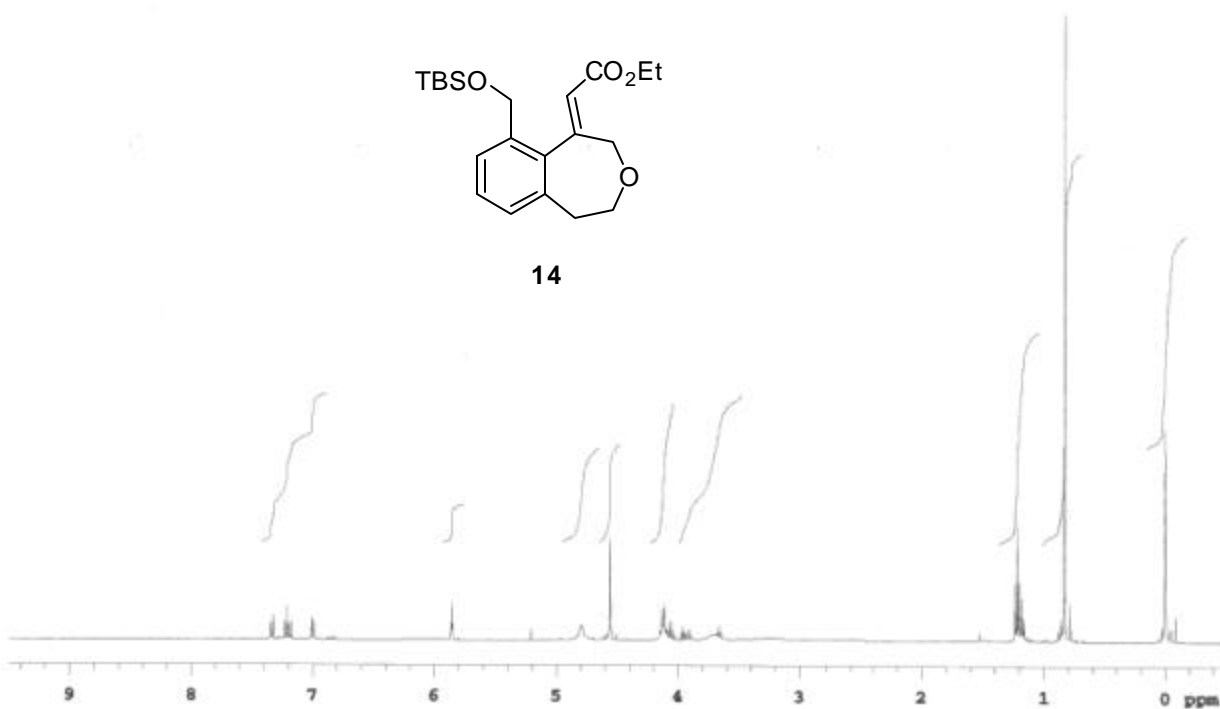

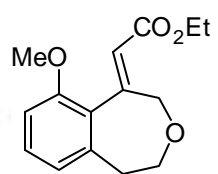**15**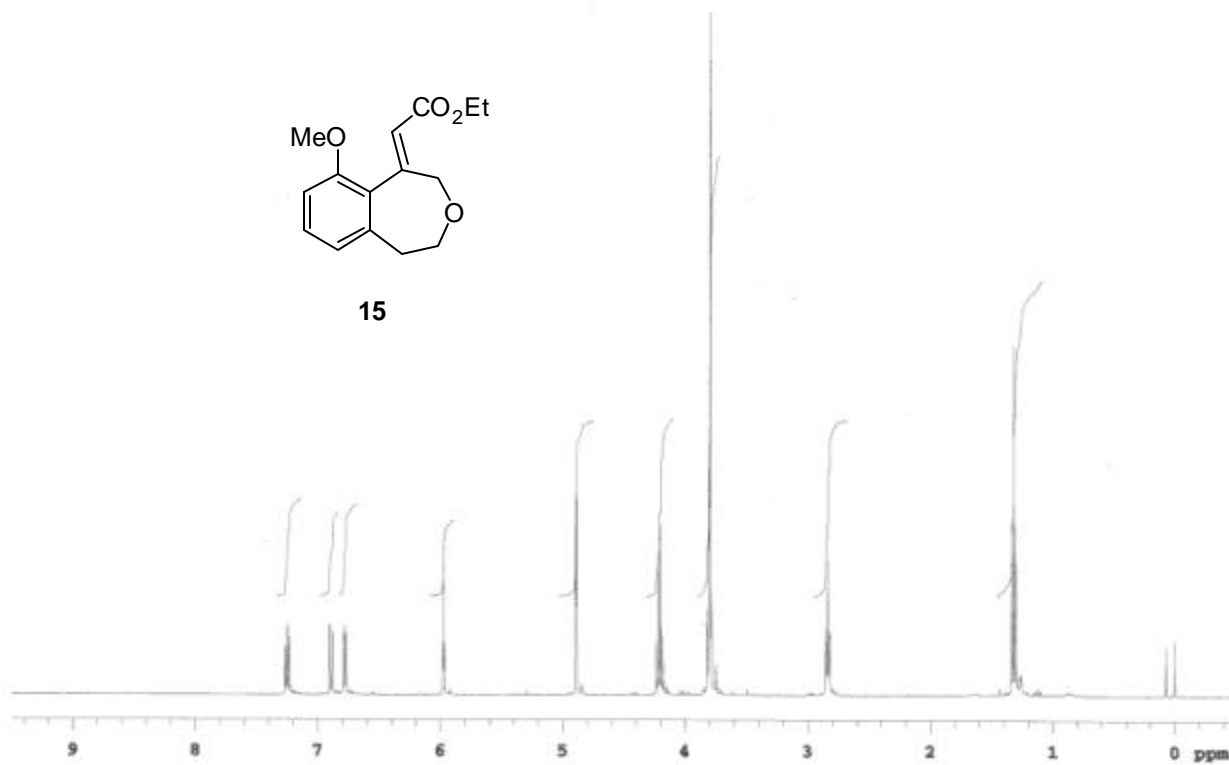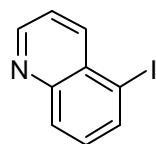**20**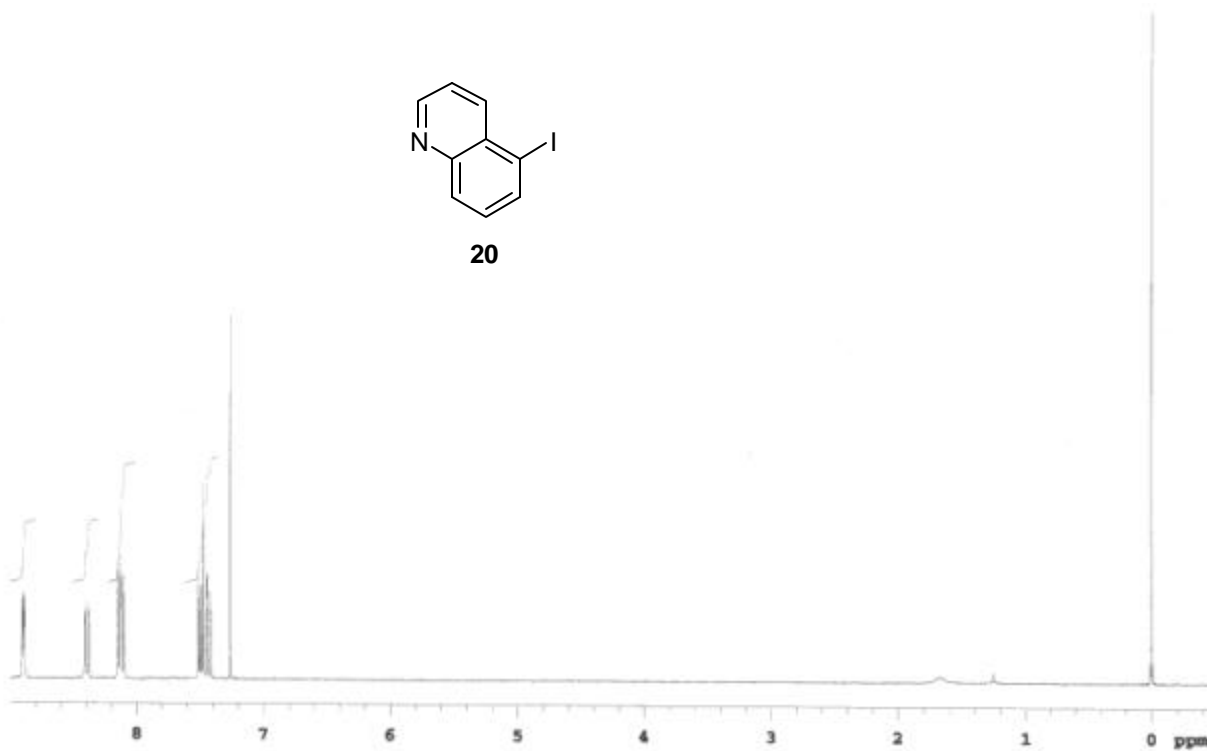

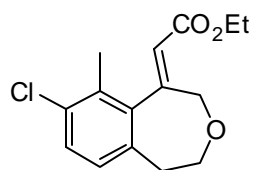**21**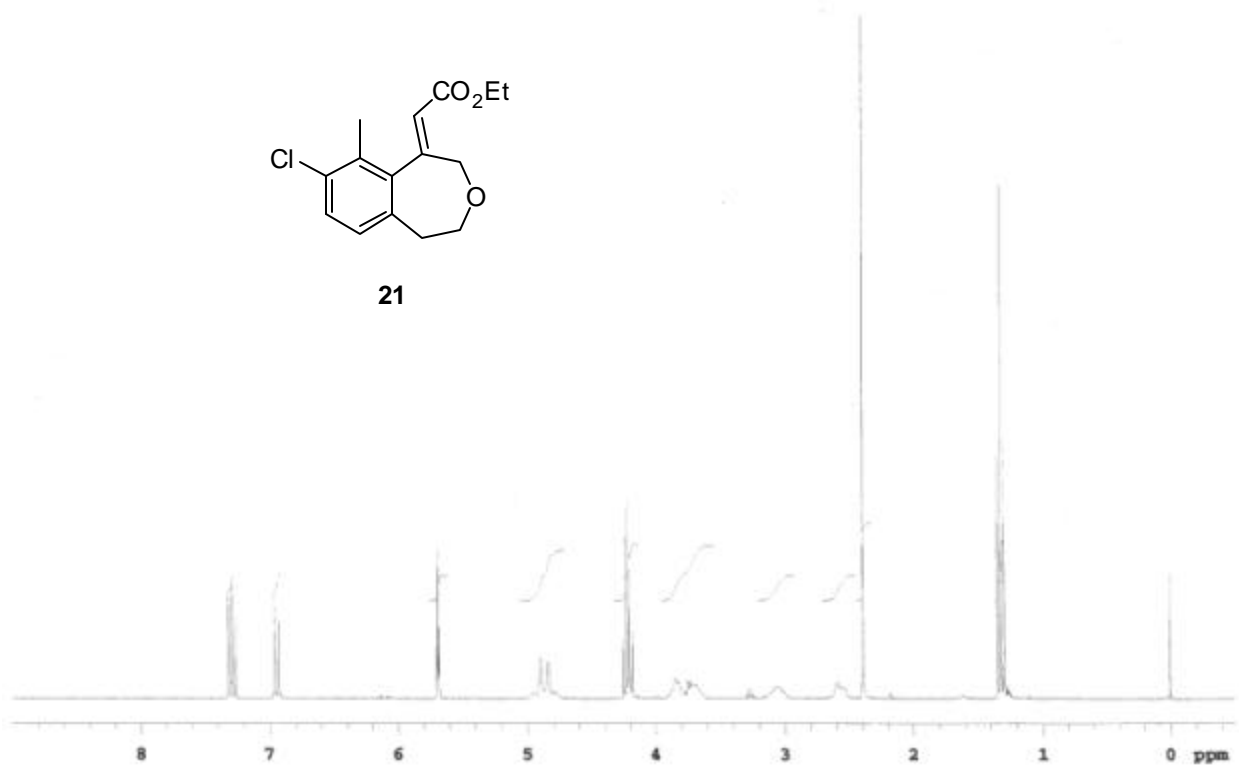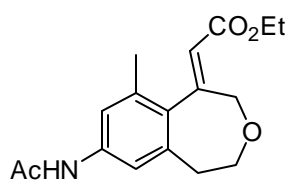**22**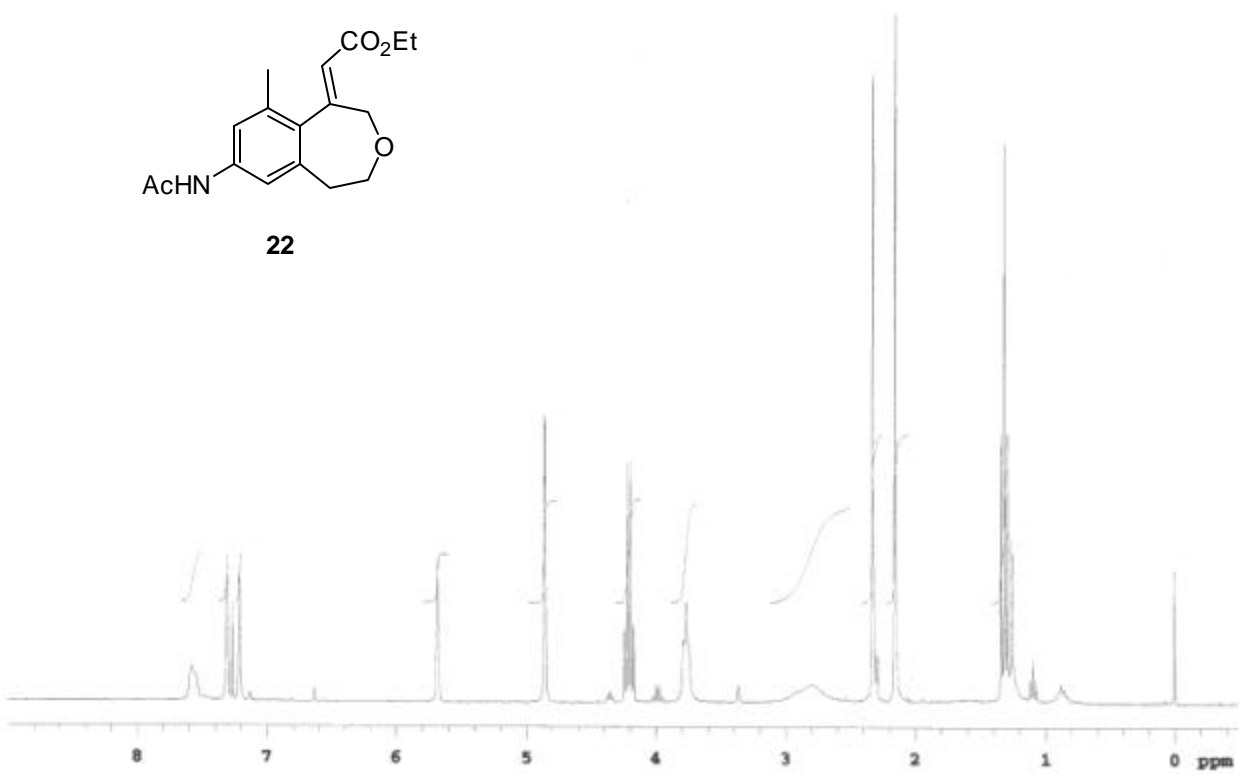

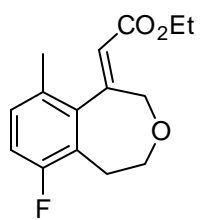**23**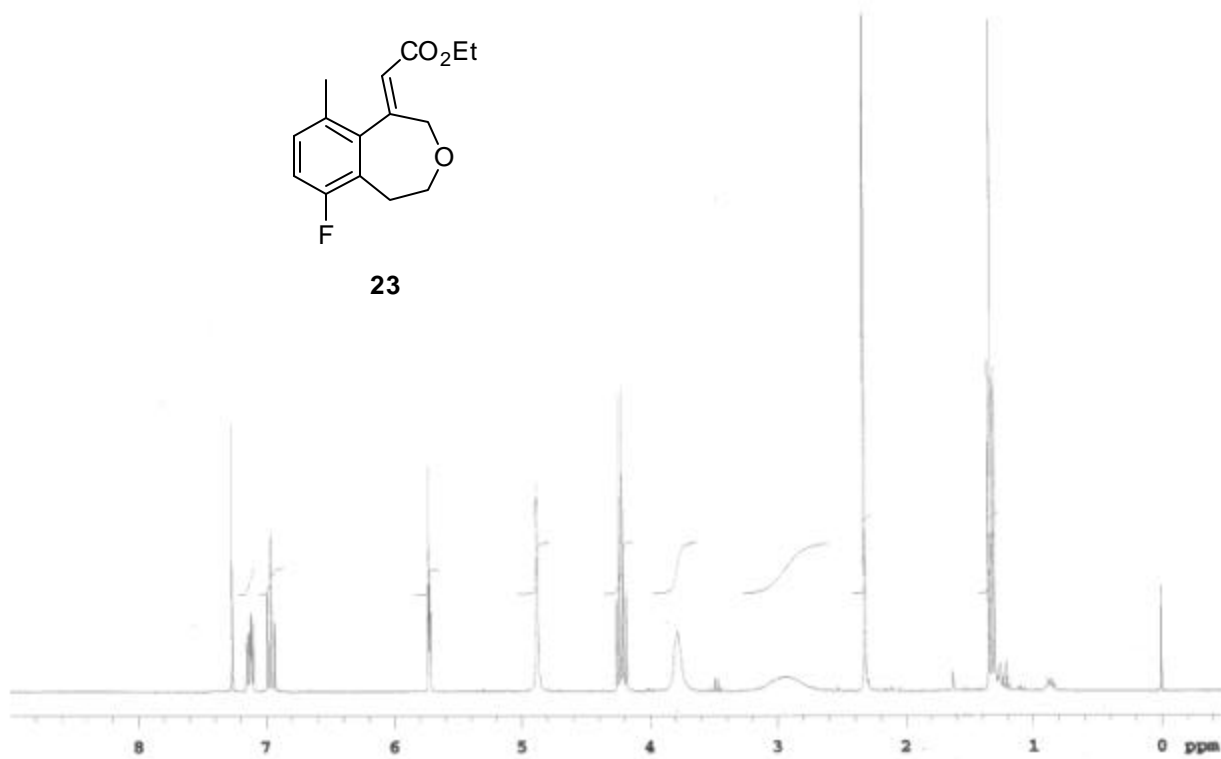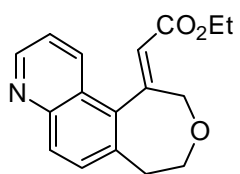**24**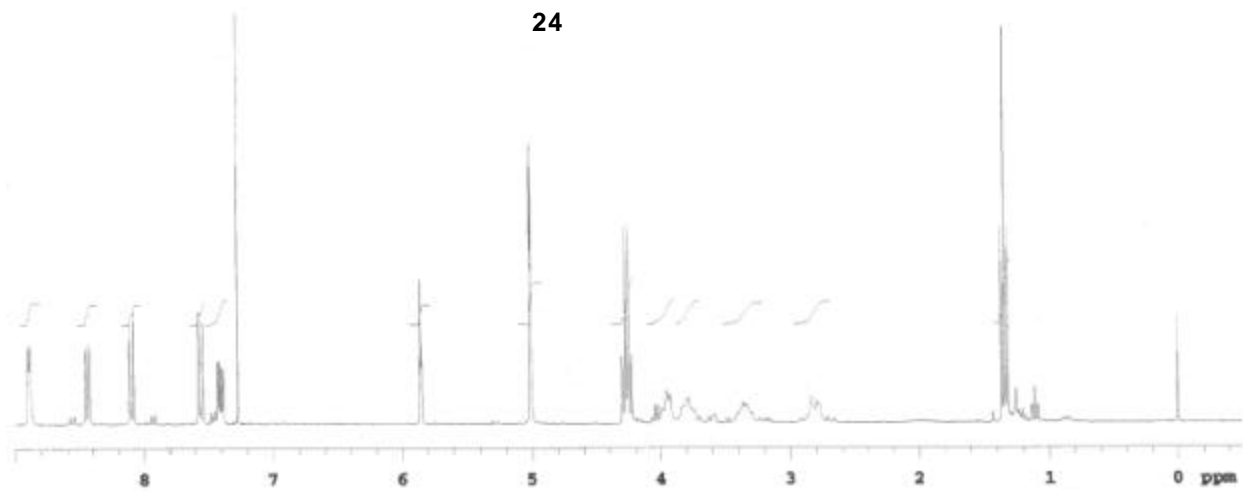

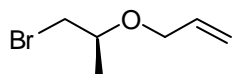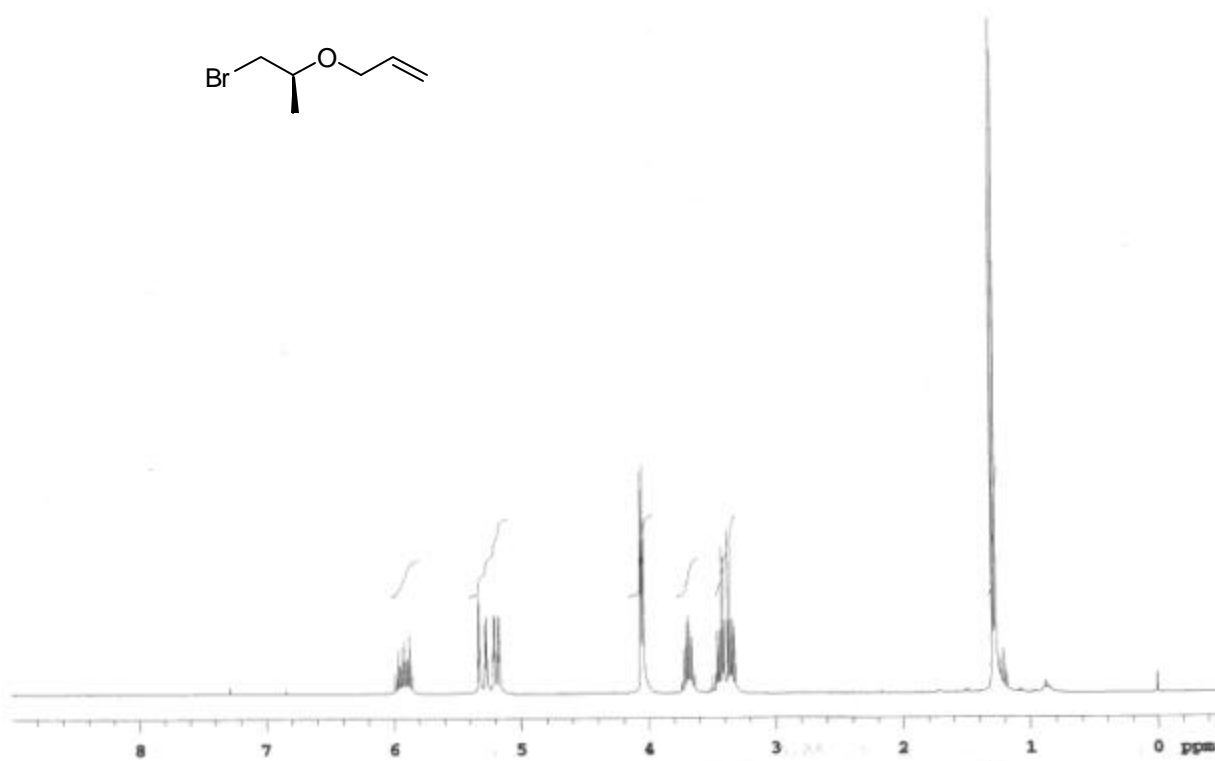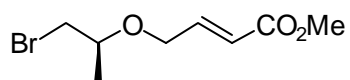

26

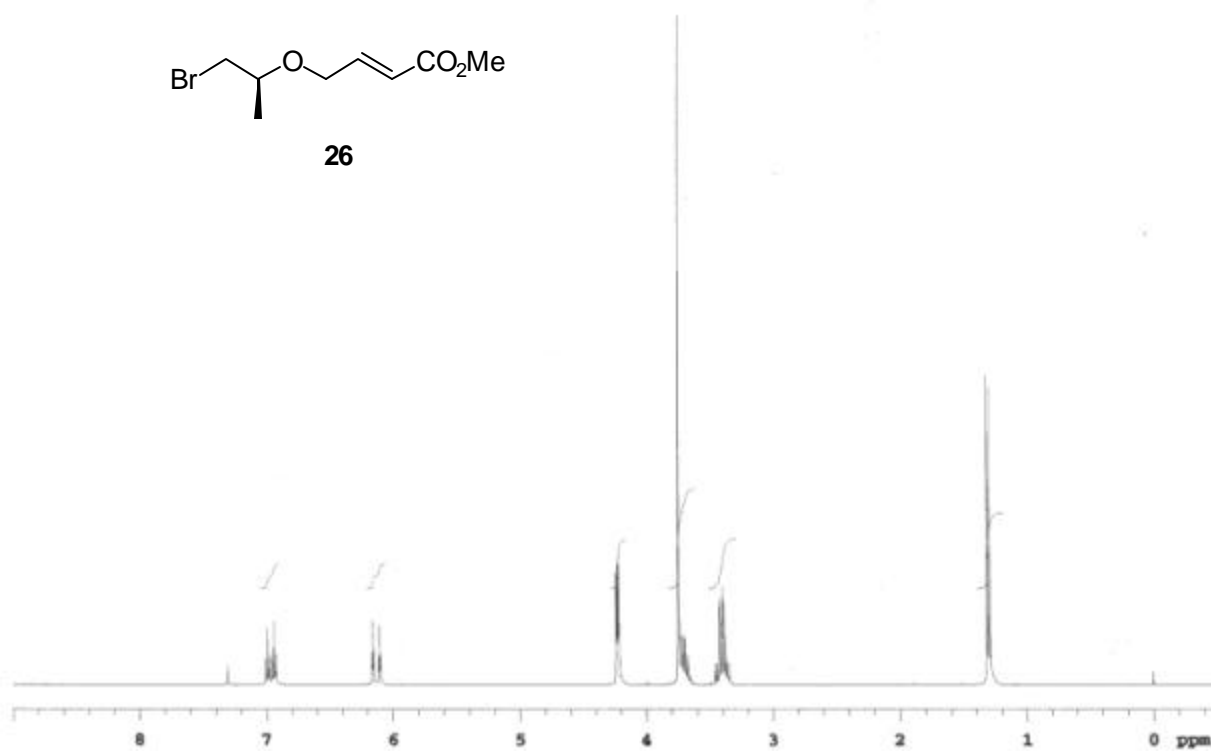

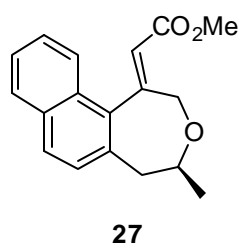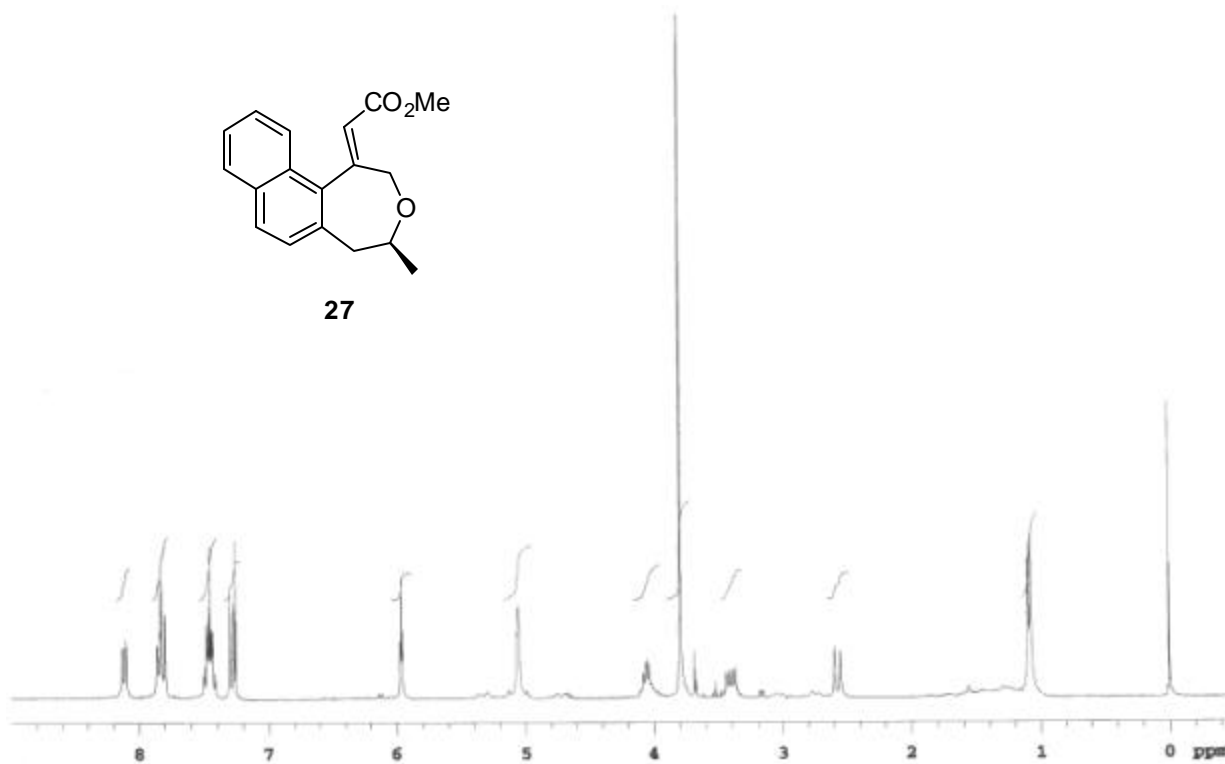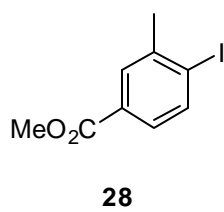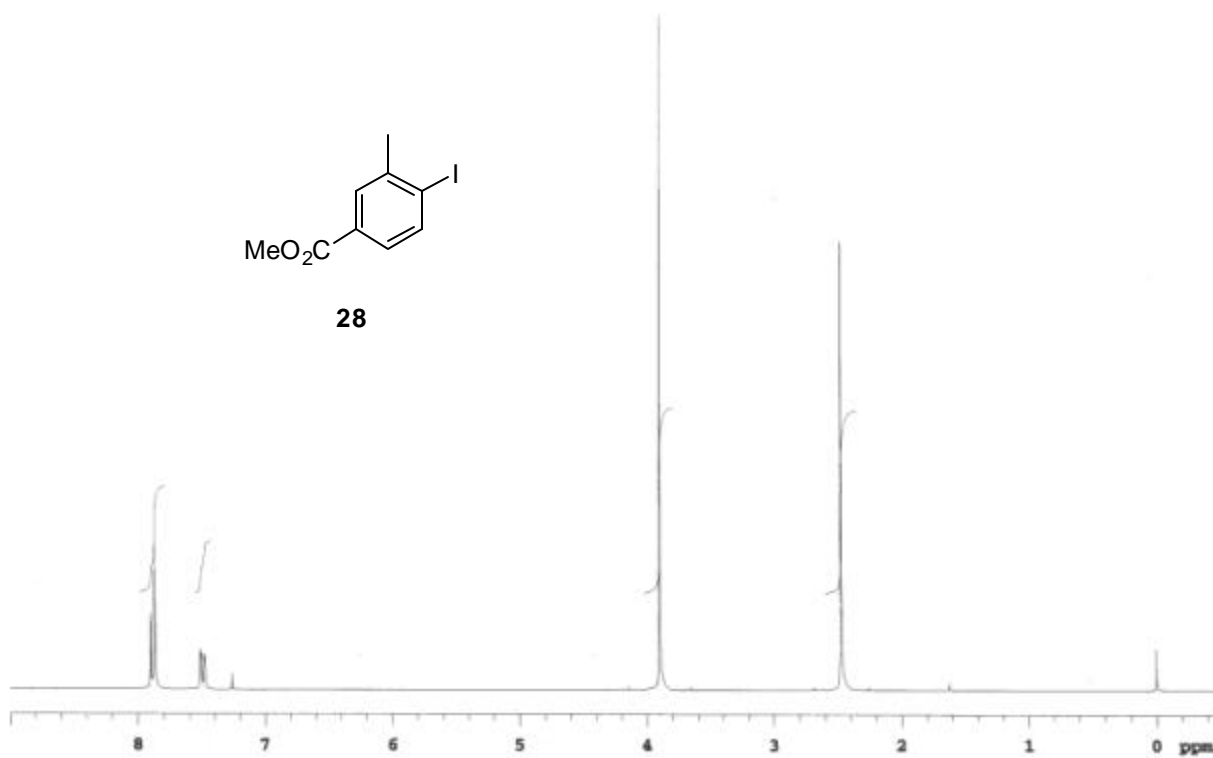

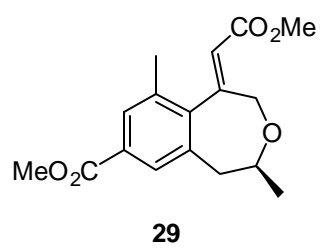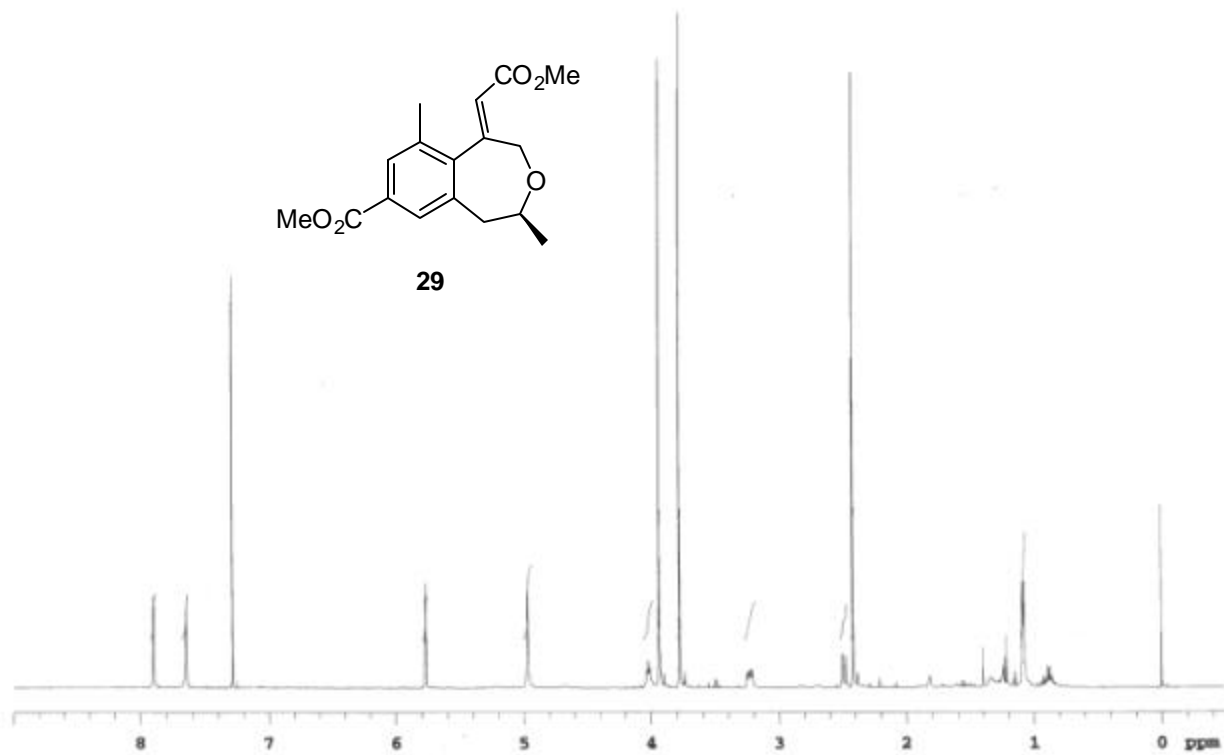

Supplement: Supplementary file 1 [file 5785446]
